# Supplementary material for: A highly efficient dual catalysis approach for C-glycosylation: addition of (o-azaaryl)carboxaldehyde to glycals
Source: Royal Society of Chemistry journal article supplement (doi:10.1039/c4cc06111j), 2014-01-01

# Highly efficient dual catalysis approach for C-glycosylation: addition of (o-azaaryl)carboxaldehyde to glycals

Yaguang Bai, Wei Lin Leng, Yongxin Li, and Xue-Wei Liu\*

*Division of Chemistry and Biological Chemistry, School of Physical & Mathematical  
Sciences, Nanyang Technological University, 21 Nanyang Link, 637371 Singapore*

E-mail: xuewei@ntu.edu.sg

## Table of Contents:

|                                                                              |     |
|------------------------------------------------------------------------------|-----|
| <b>Section A:</b> General information                                        | S2  |
| <b>Section B:</b> Experimental procedures                                    | S4  |
| <b>Section C:</b> References                                                 | S14 |
| <b>Section D:</b> Crystal data                                               | S15 |
| <b>Section E:</b> Copies of $^1\text{H}$ NMR and $^{13}\text{C}$ NMR spectra | S17 |

## General information

**General:** All the reactions were carried out in a flame or oven dried glassware with freshly distilled dry solvents under anhydrous conditions unless otherwise indicated. Organic solutions were concentrated under reduced pressure by rotary evaporation with a water bath (temperature below 40 °C). Reactions were magnetically stirred and monitored by thin-layer chromatography (TLC) carried out on 0.25 mm E. Merck silica gel plates (60–F254) using UV light at 254 nm as a visualizing agent and a KMnO<sub>4</sub> solution as stain. Product purification by flash column chromatography was accomplished using silica gel 60 (0.010–0.063 mm). Technical grade solvents were used for chromatography and were distilled prior to use. Optical rotations were measured in CHCl<sub>3</sub> or MeOH on a Schmidt + Haensdch polarimeter with a 1 cm cell (*c* given in g/100 mL). IR spectra were recorded using FTIR Restige-21 (Shimadzu). NMR spectra were recorded at room temperature on 400 MHz Bruker AVIII 400. The residual solvent signals were taken as the reference (7.26 ppm for <sup>1</sup>H NMR spectra and 77.0 ppm for <sup>13</sup>C NMR spectra in CDCl<sub>3</sub>). Sometimes the TMS signal at 0.0 ppm was used as an internal standard for <sup>1</sup>H NMR spectra. Chemical shift ( $\delta$ ) is reported in ppm, coupling constants (*J*) are given in Hz. The following abbreviations classify the multiplicity: s = singlet, d = doublet, t = triplet, q = quadruplet, m = multiplet or unresolved. HR-MS (ESI) spectra were recorded on a Waters Q-Tof premier™ mass spectrometer.

**Material:** All the palladium catalysts and phosphine ligands were purchased from commercial suppliers without any further purification. All the anhydrous solvent was purchase from commercial suppliers for direct use. The glycal starting materials ( **1a**, **1b**, **1c**, **1d** ) was synthesized by their respective reported methods.<sup>1</sup> Heterocyclic

aldehyde **2a**, **2b**, **2c**, **2d**, **2f**, **2h**, **2i**, **2j** and **2k** was purchased from commercial suppliers for direct use. Aldehyde **2e** and **2g** was synthesized by the reported synthetic methods.<sup>2</sup>

## Experimental procedure and data

**General procedure of Pd-NHC dual catalysis of C-glycosylation of glycals and 2-pyridine carboxaldehyde: synthesis of ((4aR,8aS)-2-(4-methoxyphenyl)-4,4a,8,8a-tetrahydropyrano[3,2-d][1,3]dioxin-6-yl)(pyridin-2-yl)methanone (3a):** To a round bottom flask containing the solution of **1a** (67 mg, 0.2 mmol), Pd<sub>2</sub>(dba)<sub>3</sub> (9mg, 0.01mmol), 1,1'Bis(di-*tert*-butylphosphino)ferrocene (14 mg, 0.03 mmol) in toluene (2.0 mL), 1,8-Diazabicyclo[5.4.0]undec-7-ene (0.06 mL, 0.4 mmol) was added dropwise. The mixture was stirred at room temperature for 5 minutes. Then 2-pyridinecarboxaldehyde **2a** (28 μL, 0.3 mmol) was added in a period of 10 minutes. The resulting solution was then heated to 80 °C for 3.5 hours. The mixture was then diluted with ethyl acetate (10 mL), filtered, washed with water (10 mL) and brine (10 mL). The organic layer was evaporated and the residue was purified by flash column chromatography (EtOAc/Hexane = 1/2) to afford the product as yellow solid. (63mg, 90%)

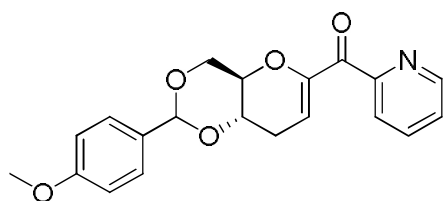

**((4aR,8aS)-2-(4-methoxyphenyl)-4,4a,8,8a-tetrahydropyrano[3,2-d][1,3]dioxin-6-yl)(pyridin-2-yl)methanone (3a):** This compound was prepared following the general procedure by the eluent EtOAc/Hexane = 1/2 as a yellow solid. (63 mg, 90%) mp 171–173 °C. <sup>1</sup>H NMR (CDCl<sub>3</sub>, 400 MHz) δ 2.51–2.59 (qd, *J* = 2.9, 9.6 Hz, 1H), 2.64–2.71 (dt, *J* = 5.8, 18.7 Hz, 1H), 3.80 (s, 3H), 3.92–3.97 (m, 2H), 3.99–4.04 (m, 1H), 4.53–4.61 (m, 1H), 5.61 (s, 1H), 6.52–6.54 (dd, *J* = 2.9, 5.6 Hz, 1H), 6.89–6.91

(d,  $J = 8.7$  Hz, 2H), 7.42–7.47 (m, 3H), 7.82–7.88 (m, 2H), 8.65–8.66 (d,  $J = 4.7$  Hz, 1H);  $^{13}\text{C}$  NMR ( $\text{CDCl}_3$ , 400 MHz)  $\delta$  27.9, 55.3, 68.8, 70.4, 73.8, 101.7, 113.8, 117.9, 124.5, 126.2, 127.5, 129.7, 137.1, 148.3, 149.5, 154.7, 160.2, 186.9  $[\alpha]_{\text{D}}^{20} = 53.5$  ( $c$  2.20,  $\text{CHCl}_3$ ); HRMS (ESI) calcd for  $\text{C}_{20}\text{H}_{20}\text{NO}_5$   $[\text{M}+\text{H}]^+$ : 354.1341, found 354.1336.

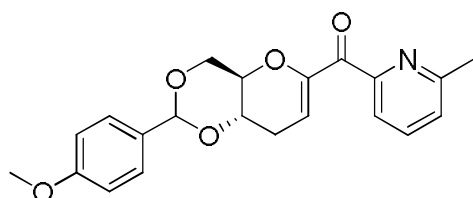

**((4aR,8aS)-2-(4-methoxyphenyl)-4,4a,8,8a-tetrahydropyrano[3,2-d][1,3]dioxin-6-yl)(6-methylpyridin-2-yl)methanone (3b):** This compound was prepared following the general procedure by the eluent EtOAc/Hexane = 1/2 as a brown solid. (61 mg, 83%) mp 182–184 °C.  $^1\text{H}$  NMR ( $\text{CDCl}_3$ , 400 MHz)  $\delta$  2.50–2.58 (qd,  $J = 2.9, 9.5$  Hz, 1H), 2.62 (s, 3H), 2.64–2.70 (m, 1H), 3.80 (s, 3H), 3.92–3.95 (m, 2H), 3.97–4.02 (m, 1H), 4.56–4.59 (m, 1H), 5.61 (s, 1H), 6.54–6.56 (dd,  $J = 2.9, 5.6$  Hz, 1H), 6.88–6.91 (d,  $J = 8.7$  Hz, 2H), 7.28–7.30 (d,  $J = 7.6$  Hz, 1H), 7.43–7.45 (d,  $J = 8.7$  Hz, 2H), 7.68–7.72 (t,  $J = 7.7$  Hz, 1H);  $^{13}\text{C}$  NMR ( $\text{CDCl}_3$ , 400 MHz)  $\delta$  24.5, 28.0, 55.3, 68.9, 70.3, 73.8, 101.7, 113.7, 118.0, 121.5, 125.8, 127.5, 129.7, 137.1, 149.5, 154.3, 157.5, 160.2, 187.1  $[\alpha]_{\text{D}}^{20} = 53.7$  ( $c$  2.60,  $\text{CHCl}_3$ ); HRMS (ESI) calcd for  $\text{C}_{21}\text{H}_{22}\text{NO}_5$   $[\text{M}+\text{H}]^+$ : 368.1498, found 368.1498

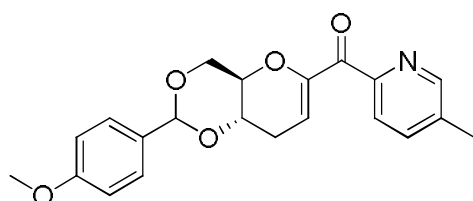

**((4aR,8aS)-2-(4-methoxyphenyl)-4,4a,8,8a-tetrahydropyrano[3,2-d][1,3]dioxin-6-yl)(5-methylpyridin-2-yl)methanone (3c):** This compound was prepared following the general procedure by the eluent EtOAc/Hexane = 1/2 as a yellow solid. (57 mg, 78%) mp 160–163 °C. <sup>1</sup>H NMR (CDCl<sub>3</sub>, 400 MHz) δ 2.41 (s, 3H), 2.51–2.58 (qd, *J* = 2.9, 9.6 Hz, 1H), 2.63–2.71 (dt, *J* = 5.9, 18.7 Hz, 1H), 3.80 (s, 3H), 3.92–3.94 (m, 2H), 3.98–4.04 (m, 1H), 4.55–4.58 (m, 1H), 5.61 (s, 1H), 6.53–6.55 (dd, *J* = 2.9, 5.7 Hz, 1H), 6.88–6.91 (m, 2H), 7.42–7.45 (m, 2H), 7.61–7.64 (m, 1H), 7.79–7.81 (d, *J* = 8.0 Hz, 1H), 8.47–8.47 (dd, *J* = 0.6, 1.4 Hz, 1H); <sup>13</sup>C NMR (CDCl<sub>3</sub>, 400 MHz) δ 18.6, 27.9, 55.3, 68.9, 70.4, 73.8, 101.7, 113.7, 117.3, 124.3, 127.5, 129.7, 136.6, 137.4, 148.8, 149.6, 152.1, 160.2, 186.8 [ $\alpha$ ]<sub>D</sub><sup>20</sup> = 58.1 (*c* 2.00, CHCl<sub>3</sub>); HRMS (ESI) calcd for C<sub>21</sub>H<sub>22</sub>NO<sub>5</sub> [M+H]<sup>+</sup>: 368.1498, found 368.1501.

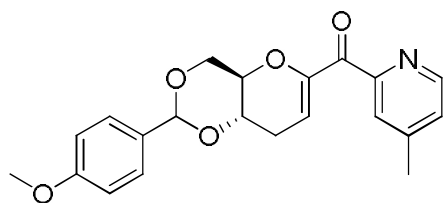

**((4aR,8aS)-2-(4-methoxyphenyl)-4,4a,8,8a-tetrahydropyrano[3,2-d][1,3]dioxin-6-yl)(4-methylpyridin-2-yl)methanone (3d):** This compound was prepared following the general procedure by the eluent EtOAc/Hexane = 1/2 as a yellow solid. (60 mg, 82%) mp 150–152 °C. <sup>1</sup>H NMR (CDCl<sub>3</sub>, 400 MHz) δ 2.42 (s, 3H), 2.51–2.59 (qd, *J* = 2.9, 9.6 Hz, 1H), 2.63–2.71 (dt, *J* = 5.8, 18.7 Hz, 1H), 3.80 (s, 3H), 3.89–3.96 (m, 2H), 3.98–4.04 (m, 1H), 4.54–4.59 (m, 1H), 5.61 (s, 1H), 6.51–6.53 (dd, *J* = 3.0, 5.6 Hz, 1H), 6.88–6.91 (m, 2H), 7.25–7.25 (d, *J* = 0.8 Hz, 2H), 7.42–7.45 (m, 1H), 7.68 (s, 1H), 8.49–8.50 (d, *J* = 5.0 Hz, 1H); <sup>13</sup>C NMR (CDCl<sub>3</sub>, 400 MHz) δ 21.1, 27.9, 55.3, 68.8, 70.4, 73.8, 101.7, 113.7, 117.8, 125.3, 127.0, 127.5, 129.7, 148.1, 148.6, 149.5,

154.6, 160.2, 187.3 [ $\alpha$ ]<sub>D</sub><sup>20</sup> = 58.3 (*c* 2.10, CHCl<sub>3</sub>); HRMS (ESI) calcd for C<sub>21</sub>H<sub>22</sub>NO<sub>5</sub> [M+H]<sup>+</sup>: 368.1498, found 368.1497.

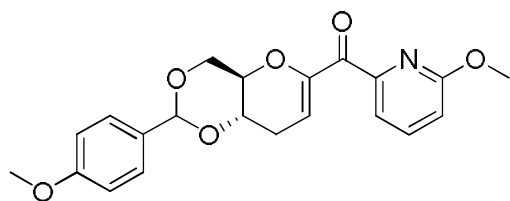

**((4aR,8aS)-2-(4-methoxyphenyl)-4,4a,8,8a-tetrahydropyrano[3,2-d][1,3]dioxin-6-yl)(6-methoxypyridin-2-yl)methanone (3e):** This compound was prepared following the general procedure by the eluent EtOAc/Hexane = 1/2 as a pale yellow solid. (55 mg, 71%) mp 143–145 °C. <sup>1</sup>H NMR (CDCl<sub>3</sub>, 400 MHz)  $\delta$  2.50–2.57 (qd, *J* = 2.9, 9.6 Hz, 1H), 2.62–2.70 (dt, *J* = 5.9, 18.6 Hz, 1H), 3.81 (s, 3H), 3.91–3.95 (m, 2H), 3.97 (s, 3H), 4.00–4.04 (m, 1H), 4.56–4.59 (m, 1H), 5.62 (s, 1H), 6.61–6.63 (dd, *J* = 2.9, 5.6 Hz, 1H), 6.89–6.92 (d, *J* = 8.8 Hz, 2H), 7.43–7.45 (d, *J* = 8.7 Hz, 2H), 7.47–7.49 (d, *J* = 7.4 Hz, 1H), 7.67–7.71 (dd, *J* = 7.4, 8.2 Hz, 1H); <sup>13</sup>C NMR (CDCl<sub>3</sub>, 400 MHz)  $\delta$  27.9, 53.6, 55.3, 68.9, 70.4, 73.9, 77.2, 101.7, 113.8, 114.2, 116.1, 117.7, 127.5, 129.8, 139.1, 149.8, 151.9, 160.3, 162.8, 186.5 [ $\alpha$ ]<sub>D</sub><sup>20</sup> = 28.8 (*c* 1.50, CHCl<sub>3</sub>); HRMS (ESI) calcd for C<sub>21</sub>H<sub>22</sub>NO<sub>6</sub> [M+H]<sup>+</sup>: 384.1447, found 384.1441.

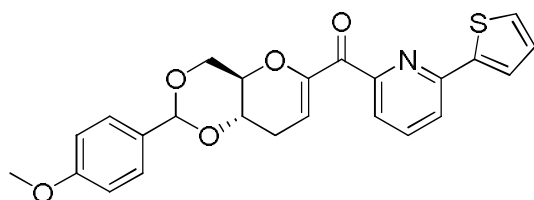

**((4aR,8aS)-2-(4-methoxyphenyl)-4,4a,8,8a-tetrahydropyrano[3,2-d][1,3]dioxin-6-yl)(6-(thiophen-2-yl)pyridin-2-yl)methanone (3f):** This compound was prepared following the general procedure by the eluent EtOAc/Hexane = 1/2 as a bright yellow

solid. (74 mg, 85%) mp 171–172 °C.  $^1\text{H}$  NMR ( $\text{CDCl}_3$ , 400 MHz)  $\delta$  2.54–2.61 (qd,  $J = 2.9, 9.6$  Hz, 1H), 2.66–2.73 (dt,  $J = 5.9, 18.7$  Hz, 1H), 3.81 (s, 3H), 3.95–3.97 (m, 2H), 3.99–4.05 (m, 1H), 4.56–4.63 (m, 1H), 5.63 (s, 1H), 5.91–5.93 (dd,  $J = 3.0, 5.6$  Hz, 1H), 6.71–6.73 (dd,  $J = 2.9, 5.6$  Hz, 1H), 6.90–6.92 (d,  $J = 8.7$ , 2H), 7.42–7.44 (m, 3H), 7.68–7.69 (dd,  $J = 1.0, 5.0$  Hz, 1H), 7.75–7.77 (d,  $J = 7.4$  Hz, 1H), 7.82–7.86 (m, 1H), 7.94–7.94 (d,  $J = 1.0$  Hz, 1H);  $^{13}\text{C}$  NMR ( $\text{CDCl}_3$ , 400 MHz)  $\delta$  28.0, 55.3, 68.9, 70.4, 73.9, 101.7, 113.8, 117.5, 122.3, 122.4, 124.3, 126.2, 126.7, 127.5, 129.8, 137.7, 141.5, 149.6, 152.2, 154.4, 160.3, 186.8  $[\alpha]_{\text{D}}^{20} = 44.0$  ( $c$  2.50,  $\text{CHCl}_3$ ); HRMS (ESI) calcd for  $\text{C}_{24}\text{H}_{22}\text{NO}_5\text{S}$   $[\text{M}+\text{H}]^+$ : 436.1219, found 436.1216

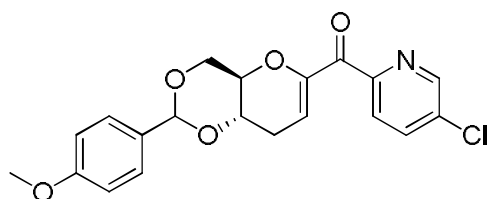

**(5-chloropyridin-2-yl)((4aR,8aS)-2-(4-methoxyphenyl)-4,4a,8,8a-tetrahydro-pyrano[3,2-d][1,3]dioxin-6-yl)methanone (3g):** This compound was prepared following the general procedure by the eluent EtOAc/Hexane = 1/2 to as a white solid. (25 mg, 32%) mp 200–201 °C.  $^1\text{H}$  NMR ( $\text{CDCl}_3$ , 400 MHz)  $\delta$  2.41 (s, 3H), 2.52–2.59 (qd,  $J = 2.9, 9.6$  Hz, 1H), 2.65–2.73 (dt,  $J = 5.9, 18.7$  Hz, 1H), 3.81 (s, 3H), 3.92–3.95 (m, 2H), 3.98–4.02 (m, 1H), 4.55–4.58 (m, 1H), 5.62 (s, 1H), 6.55–6.57 (dd,  $J = 2.9, 5.6$  Hz, 1H), 6.92–6.92 (d,  $J = 2.9$  Hz, 2H), 7.43–7.45 (d,  $J = 8.7$ , Hz, 2H), 7.80–7.83 (dd,  $J = 2.3, 8.4$  Hz, 1H), 7.86–7.89 (d,  $J = 8.4$  Hz, 1H), 8.60–8.61 (d,  $J = 2.2$  Hz, 1H);  $^{13}\text{C}$  NMR ( $\text{CDCl}_3$ , 400 MHz)  $\delta$  27.9, 55.3, 68.8, 70.5, 73.7, 101.7, 113.8, 117.7, 125.5, 127.5, 129.7, 135.2, 136.9, 147.3, 149.3, 152.4, 160.3, 186.8  $[\alpha]_{\text{D}}^{20} = 16.1$  ( $c$  0.90,  $\text{CHCl}_3$ ); HRMS (ESI) calcd for  $\text{C}_{20}\text{H}_{19}\text{NO}_5\text{Cl}$   $[\text{M}+\text{H}]^+$ : 388.0952, found 388.0955.



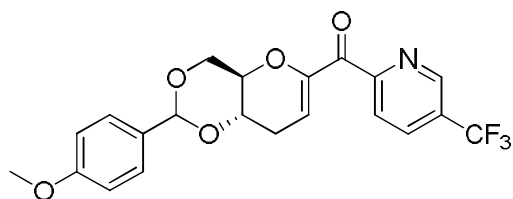

**((4aR,8aS)-2-(4-methoxyphenyl)-4,4a,8,8a-tetrahydropyrano[3,2-d][1,3]dioxin-6-yl)(5-(trifluoromethyl)pyridin-2-yl)methanone (3h):** This compound was prepared following the general procedure by the eluent EtOAc/Hexane = 1/2 as a white solid. (38 mg, 45%) mp 195–197 °C. <sup>1</sup>H NMR (CDCl<sub>3</sub>, 400 MHz) δ 2.52–2.60 (qd, *J* = 2.9, 9.6 Hz, 1H), 2.66–2.74 (dt, *J* = 5.8, 18.9 Hz, 1H), 3.81 (s, 3H), 3.90–3.96 (m, 2H), 3.97–4.05 (m, 1H), 4.56–4.61 (m, 1H), 5.62 (s, 1H), 6.53–6.56 (dd, *J* = 3.0, 5.7 Hz, 1H), 6.89–6.92 (dd, *J* = 2.0, 6.8 Hz, 2H), 7.45–7.45 (d, *J* = 1.8, Hz, 2H), 7.98–8.00 (d, *J* = 8.2 Hz, 1H), 8.08–8.11 (dd, *J* = 1.8, 8.2 Hz, 1H), 8.91–8.92 (m, 1H); <sup>13</sup>C NMR (CDCl<sub>3</sub>, 400 MHz) δ 28.0, 55.3, 68.8, 70.6, 73.6, 101.8, 113.8, 118.4, 124.2, 127.5, 129.6, 134.4, 134.4, 145.3, 145.3, 149.3, 160.3, 185.6 [ $\alpha$ ]<sub>D</sub><sup>20</sup> = 28.8 (*c* 1.10, CHCl<sub>3</sub>); HRMS (ESI) calcd for C<sub>21</sub>H<sub>22</sub>NO<sub>6</sub> [M+H]<sup>+</sup>: 384.1447, found 384.1441.

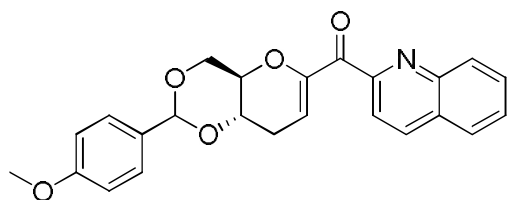

**((4aR,8aS)-2-(4-methoxyphenyl)-4,4a,8,8a-tetrahydropyrano[3,2-d][1,3]dioxin-6-yl)(quinolin-2-yl)methanone (3i):** This compound was prepared following the general procedure by the eluent EtOAc/Hexane = 1/2 as a brown solid. (59 mg, 73%) mp 162–164 °C. <sup>1</sup>H NMR (CDCl<sub>3</sub>, 400 MHz) δ 2.55–2.63 (qd, *J* = 2.9, 9.6 Hz, 1H),

2.64–2.71 (dt,  $J = 5.9, 18.6$  Hz, 1H), 3.81 (s, 3H), 3.95–4.07 (m, 3H), 4.58–4.64 (m, 1H), 5.64 (s, 1H), 6.76–6.78 (dd,  $J = 2.9, 5.6$  Hz, 1H), 6.89–6.93 (m, 2H), 7.44–7.47 (m, 2H), 7.63–7.67 (ddd,  $J = 1.1, 7.0, 8.1$  Hz, 1H), 7.78–7.82 (ddd,  $J = 1.4, 6.9, 8.4$  Hz, 1H), 7.87–7.89 (d,  $J = 8.2$  Hz, 1H), 7.92–7.95 (d,  $J = 8.5$  Hz, 1H), 8.18–8.20 (d,  $J = 8.6$  Hz, 1H), 8.28–8.30 (d,  $J = 8.5$  Hz, 1H);  $^{13}\text{C}$  NMR ( $\text{CDCl}_3$ , 400 MHz)  $\delta$  28.1, 55.3, 68.9, 70.5, 73.8, 101.8, 113.8, 118.6, 120.7, 127.5, 127.7, 128.4, 128.9, 129.8, 130.3, 137.1, 146.6, 149.5, 154.3, 160.3, 187.1  $[\alpha]_{\text{D}}^{20} = 49.2$  ( $c$  1.60,  $\text{CHCl}_3$ ); HRMS (ESI) calcd for  $\text{C}_{24}\text{H}_{22}\text{NO}_5$   $[\text{M}+\text{H}]^+$ : 404.1498, found 404.1493

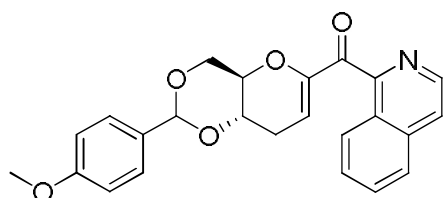

**isoquinolin-1-yl((4aR,8aS)-2-(4-methoxyphenyl)-4,4a,8,8a-tetrahydropyrano[3,2-d][1,3]dioxin-6-yl)methanone (3j)**: This compound was prepared following the general procedure by the eluent EtOAc/Hexane = 1/2 as a yellow solid. (56 mg, 70%) mp 197–200 °C.  $^1\text{H}$  NMR ( $\text{CDCl}_3$ , 400 MHz)  $\delta$  2.46–2.33 (qd,  $J = 2.9, 9.4$  Hz, 1H), 2.57–2.65 (dt,  $J = 5.8, 18.8$  Hz, 1H), 3.80 (s, 3H), 3.94–4.05 (m, 3H), 4.58–4.65 (m, 1H), 5.62 (s, 1H), 5.91–5.93 (dd,  $J = 3.0, 5.6$  Hz, 1H), 6.88–6.92 (m, 2H), 7.43–7.45 (d,  $J = 8.7$  Hz, 2H), 7.62–7.66 (ddd,  $J = 1.2, 5.9, 8.2$  Hz, 1H), 7.72–7.78 (m, 2H), 7.88–7.90 (d,  $J = 8.2$  Hz, 1H), 8.10–8.12 (d,  $J = 8.4$  Hz, 1H), 8.54–8.56 (d,  $J = 5.6$  Hz, 1H);  $^{13}\text{C}$  NMR ( $\text{CDCl}_3$ , 400 MHz)  $\delta$  28.0, 55.3, 68.8, 70.6, 73.7, 101.8, 113.8, 118.3, 122.7, 125.9, 126.2, 127.1, 127.5, 128.4, 129.7, 130.8, 136.6, 141.0, 150.6, 155.6, 160.3, 188.7  $[\alpha]_{\text{D}}^{20} = 35.9$  ( $c$  1.20,  $\text{CHCl}_3$ ); HRMS (ESI) calcd for  $\text{C}_{24}\text{H}_{22}\text{NO}_5$   $[\text{M}+\text{H}]^+$ : 404.1498, found 404.1491

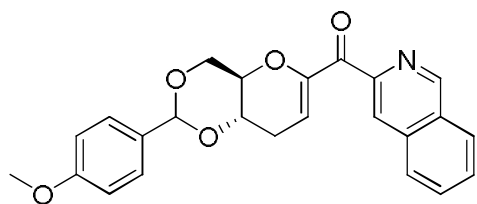

**isoquinolin-3-yl((4aR,8aS)-2-(4-methoxyphenyl)-4,4a,8,8a-tetrahydropyrano[3,2-d][1,3]dioxin-6-yl)methanone (3k):** This compound was prepared following the general procedure by the eluent EtOAc/Hexane = 1/2 as a yellow solid. (55 mg, 68%) mp 171–172 °C. <sup>1</sup>H NMR (CDCl<sub>3</sub>, 400 MHz) δ 2.55–2.62 (qd, *J* = 2.9, 9.6 Hz, 1H), 2.66–2.74 (dt, *J* = 5.8, 18.6 Hz, 1H), 3.81 (s, 3H), 3.94–3.99 (m, 2H), 4.01–4.08 (m, 1H), 4.56–4.63 (m, 1H), 5.63 (s, 1H), 6.58–6.60 (dd, *J* = 2.9, 5.6 Hz, 1H), 6.90–6.92 (dd, *J* = 2.0, 6.8, 2H), 7.44–7.46 (dd, *J* = 1.9, 6.8, 2H), 7.72–7.81 (m, 2H), 7.96–7.98 (d, *J* = 8.0 Hz, 1H), 8.05–8.07 (d, *J* = 8.0 Hz, 1H), 8.35 (s, 1H), 9.27 (s, 1H); <sup>13</sup>C NMR (CDCl<sub>3</sub>, 400 MHz) δ 28.0, 55.3, 68.9, 70.5, 73.9, 101.7, 113.8, 117.0, 123.2, 127.5, 127.6, 128.1, 129.5, 129.7, 131.2, 135.6, 148.4, 150.0, 160.2, 187.2, 126.7, 127.5, 129.8, 137.7, 141.5, 149.6, 152.2, 154.4, 160.3, 186.8 [ $\alpha$ ]<sub>D</sub><sup>20</sup> = 53.4 (*c* 2.00, CHCl<sub>3</sub>); HRMS (ESI) calcd for C<sub>24</sub>H<sub>22</sub>NO<sub>5</sub> [M+H]<sup>+</sup>: 404.1498, found 404.1500

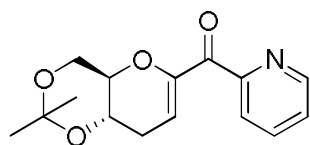

**((4aR,8aS)-2,2-dimethyl-4,4a,8,8a-tetrahydropyrano[3,2-d][1,3]dioxin-6-yl)(pyridin-2-yl)methanone (3l):** This compound was prepared following the general procedure by the eluent EtOAc/Hexane = 1/5 as a white solid. (45 mg, 82%) mp 84–

86 °C.  $^1\text{H}$  NMR ( $\text{CDCl}_3$ , 400 MHz)  $\delta$  1.44 (s, 3H), 1.55 (s, 3H), 2.35–2.43 (qd,  $J = 2.9, 9.8$  Hz, 1H), 2.48–2.56 (dt,  $J = 5.8, 18.5$  Hz, 1H), 3.74–3.80 (m, 1H), 3.95–4.00 (t,  $J = 10.8$  Hz, 1H), 4.02–4.09 (m, 1H), 4.15–4.19 (dd,  $J = 5.5, 11.0$  Hz, 1H), 6.46–6.48 (q,  $J = 2.9$  Hz, 1H), 7.42–7.46 (ddd,  $J = 2.0, 4.8, 6.9$  Hz, 1H), 7.81–7.87 (m, 2H), 8.63–8.65 (m, 1H);  $^{13}\text{C}$  NMR ( $\text{CDCl}_3$ , 400 MHz)  $\delta$  19.0, 28.4, 29.1, 62.1, 66.3, 71.5, 99.7, 118.0, 124.5, 126.1, 137.1, 148.3, 149.5, 154.7, 187.0  $[\alpha]_{\text{D}}^{20} = 62.8$  ( $c$  1.50,  $\text{CHCl}_3$ ); HRMS (ESI) calcd for  $\text{C}_{15}\text{H}_{18}\text{NO}_4$   $[\text{M}+\text{H}]^+$ : 276.1236, found 276.1233

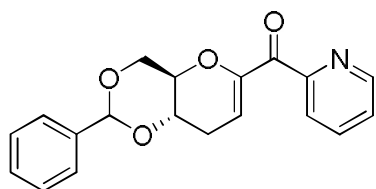

**((4aR,8aS)-2-phenyl-4,4a,8,8a-tetrahydropyrano[3,2-d][1,3]dioxin-6-yl)(pyridin-2-yl)methanone (3m):** This compound was prepared following the general procedure by the eluent EtOAc/Hexane = 1/3 as a white solid. (56 mg, 87%) mp 140–141 °C.  $^1\text{H}$  NMR ( $\text{CDCl}_3$ , 400 MHz)  $\delta$  2.53–2.61 (qd,  $J = 2.9, 12.6$  Hz, 1H), 2.62–2.70 (dt,  $J = 5.9, 18.6$  Hz, 1H), 3.92–3.99 (m, 2H), 3.99–4.07 (m, 1H), 4.57–4.62 (m, 1H), 5.66 (s, 1H), 6.54–6.56 (dd,  $J = 2.9, 5.7$  Hz, 1H), 7.35–7.41 (m, 3H), 7.43–7.47 (m, 1H), 7.50–7.53 (m, 2H), 7.82–7.89 (m, 2H), 8.64–8.67 (m, 1H);  $^{13}\text{C}$  NMR ( $\text{CDCl}_3$ , 400 MHz)  $\delta$  27.9, 68.9, 70.4, 73.9, 77.2, 101.8, 117.8, 124.5, 126.2, 128.4, 129.2, 148.3, 149.5, 154.7, 186.9  $[\alpha]_{\text{D}}^{20} = 90.9$  ( $c$  1.10,  $\text{CHCl}_3$ ); HRMS (ESI) calcd for  $\text{C}_{21}\text{H}_{22}\text{NO}_6$   $[\text{M}+\text{H}]^+$ : 324.1236, found 324.1227.

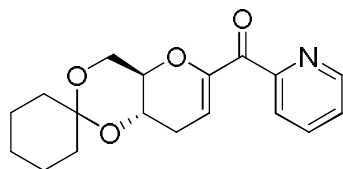

**pyridin-2-yl((4a'R,8a'S)-4',4a',8',8a'-tetrahydrospiro[cyclohexane-1,2'-pyrano-**

**[3,2-d][1,3]dioxine]-6'-yl)methanone (3n):** This compound was prepared following

the general procedure by the eluent EtOAc/Hexane = 1/4 as a brown oil. (45 mg, 72%)

$^1\text{H}$  NMR ( $\text{CDCl}_3$ , 400 MHz)  $\delta$  1.41–1.53 (m, 4H), 1.58–1.67 (m, 4H), 1.90–1.93 (m, 1H), 2.04–2.08 (m, 1H), 2.36–2.44 (qd,  $J = 2.8, 9.7$  Hz, 1H), 2.49–2.56 (dt,  $J = 5.9, 18.4$  Hz, 1H), 3.75–3.82 (m, 1H), 3.95–4.00 (m, 1H), 4.06–4.10 (m, 1H), 4.12–4.18 (m, 1H), 6.45–6.48 (dd,  $J = 2.8, 5.7$  Hz, 1H), 7.43–7.46 (m, 1H), 7.81–7.87 (m, 2H), 8.64–8.66 (d,  $J = 4.8$  Hz, 1H);  $^{13}\text{C}$  NMR ( $\text{CDCl}_3$ , 400 MHz)  $\delta$  22.5, 22.7, 25.6, 27.8, 28.5, 38.0, 61.4, 65.4, 71.8, 99.8, 118.1, 124.5, 126.1, 137.0, 148.3, 149.5, 154.8, 187.1 [ $\alpha$ ] $^{\text{D}}_{20} = 21.1$  ( $c$  1.10,  $\text{CHCl}_3$ ); HRMS (ESI) calcd for  $\text{C}_{18}\text{H}_{22}\text{NO}_4$  [ $\text{M}+\text{H}$ ] $^+$ : 316.1549, found 316.1551.

## References

1. (a) Barrows, R. S.; Lindwall, H. G. *J. Am. Chem. Soc.* **1942**, *64*, 2430. (b) Jones, S. W.; Palmer, C. F.; Paul, J. M.; Tiffin, P. D. *Tetrahedron Lett.* **1999**, *40*, 1211.
2. (a) Ma, J.; Ng, S.; Zeng, J.; Chen, P.; Than, A.; Zhang, J.; Zhao, Y. *Chem. Eur. J.* **2010**, *16*, 4533. (b) Doetz, K. H.; Otto, F.; Nieger, M. *J. Organomet. Chem.* **2001**, *621*, 77.

## Crystal Data

Crystal Image of Compound **3a**

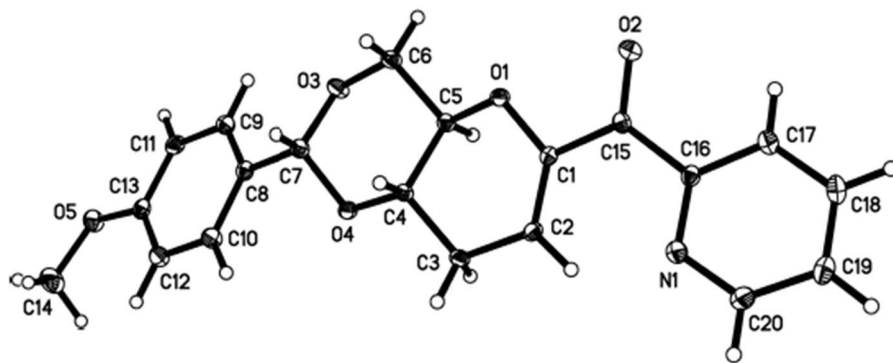

### Basic Crystal Data of Compound 3a

|                               |                                                 |                |
|-------------------------------|-------------------------------------------------|----------------|
| <b>Chemical formula</b>       | C <sub>20</sub> H <sub>19</sub> NO <sub>5</sub> |                |
| <b>Formula weight</b>         | 353.36                                          |                |
| <b>Temperature</b>            | 103(2) K                                        |                |
| <b>Wavelength</b>             | 0.71073 Å                                       |                |
| <b>Crystal size</b>           | 0.400 x 0.410 x 0.420 mm                        |                |
| <b>Crystal habit</b>          | colorless block                                 |                |
| <b>Crystal system</b>         | monoclinic                                      |                |
| <b>Space group</b>            | P 1 21 1                                        |                |
| <b>Unit cell dimensions</b>   | a = 7.3058(7) Å                                 | α = 90°        |
|                               | b = 6.2839(6) Å                                 | β = 97.945(2)° |
|                               | c = 18.0298(16) Å                               | γ = 90°        |
| <b>Volume</b>                 | 819.78(13) Å <sup>3</sup>                       |                |
| <b>Z</b>                      | 2                                               |                |
| <b>Density (calculated)</b>   | 1.432 g/cm <sup>3</sup>                         |                |
| <b>Absorption coefficient</b> | 0.103 mm <sup>-1</sup>                          |                |
| <b>F(000)</b>                 | 372                                             |                |



02-238-001, CDCl<sub>3</sub>, 1H, 400 BBFO1

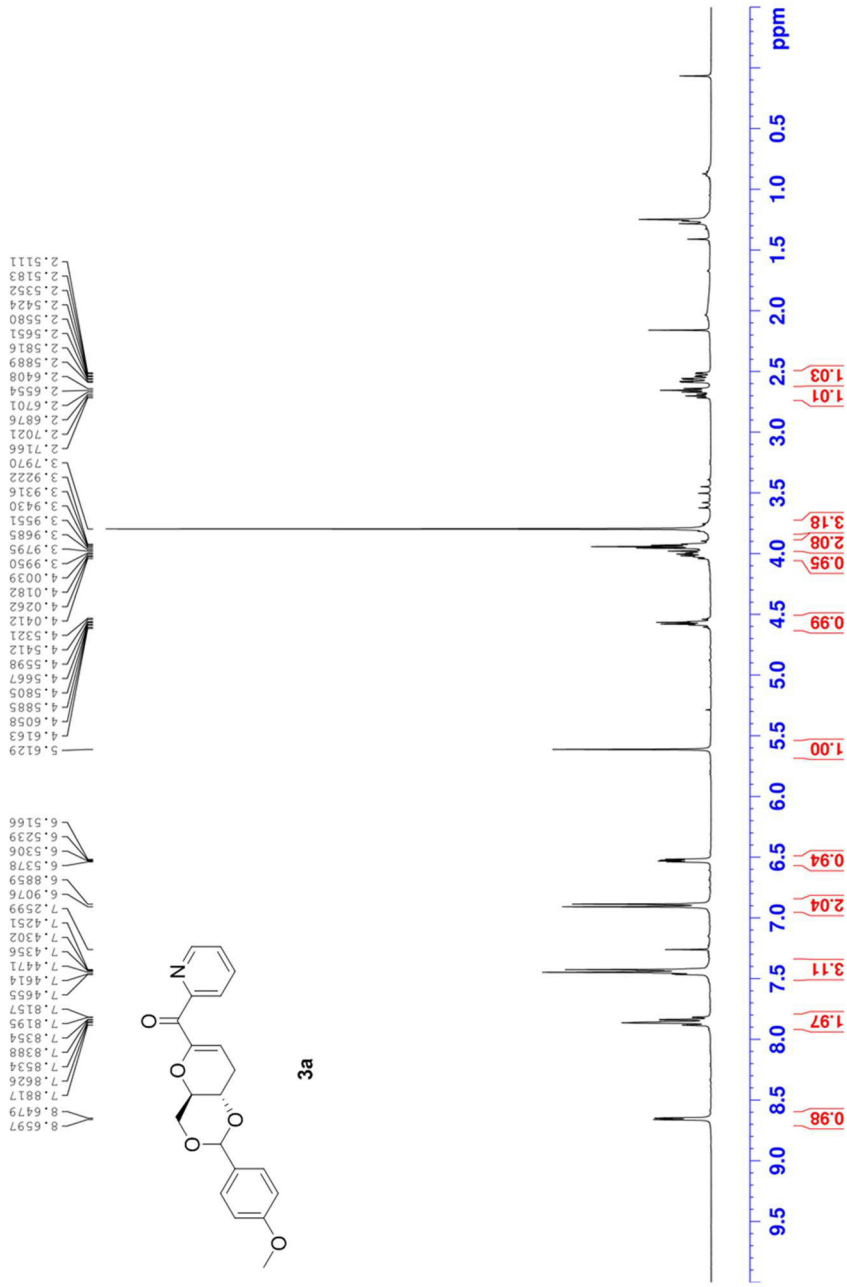

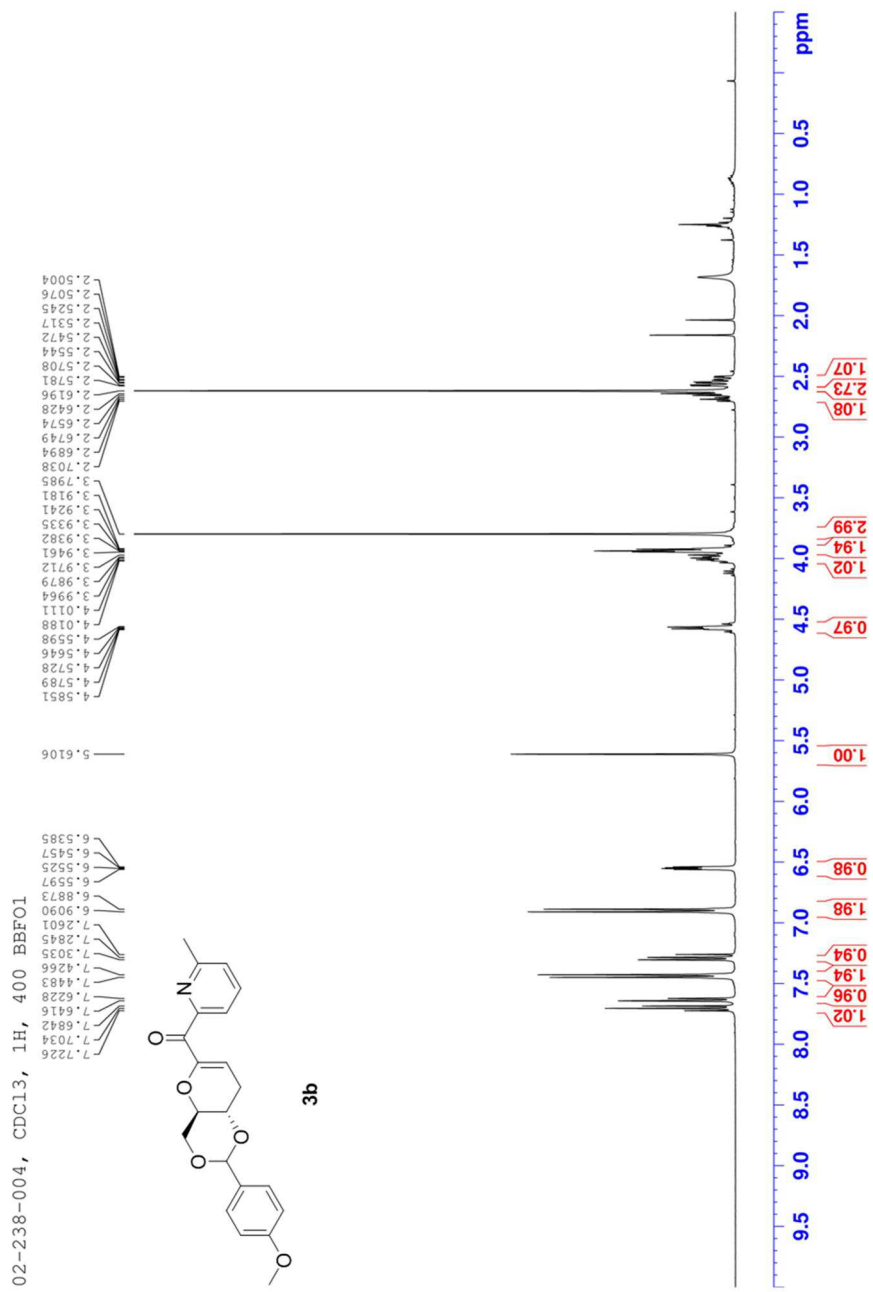

02-238-004, CDCl<sub>3</sub>, 13C, 400 BBFO1

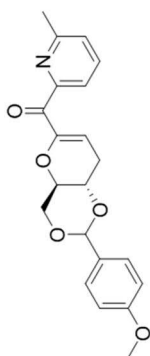

3b

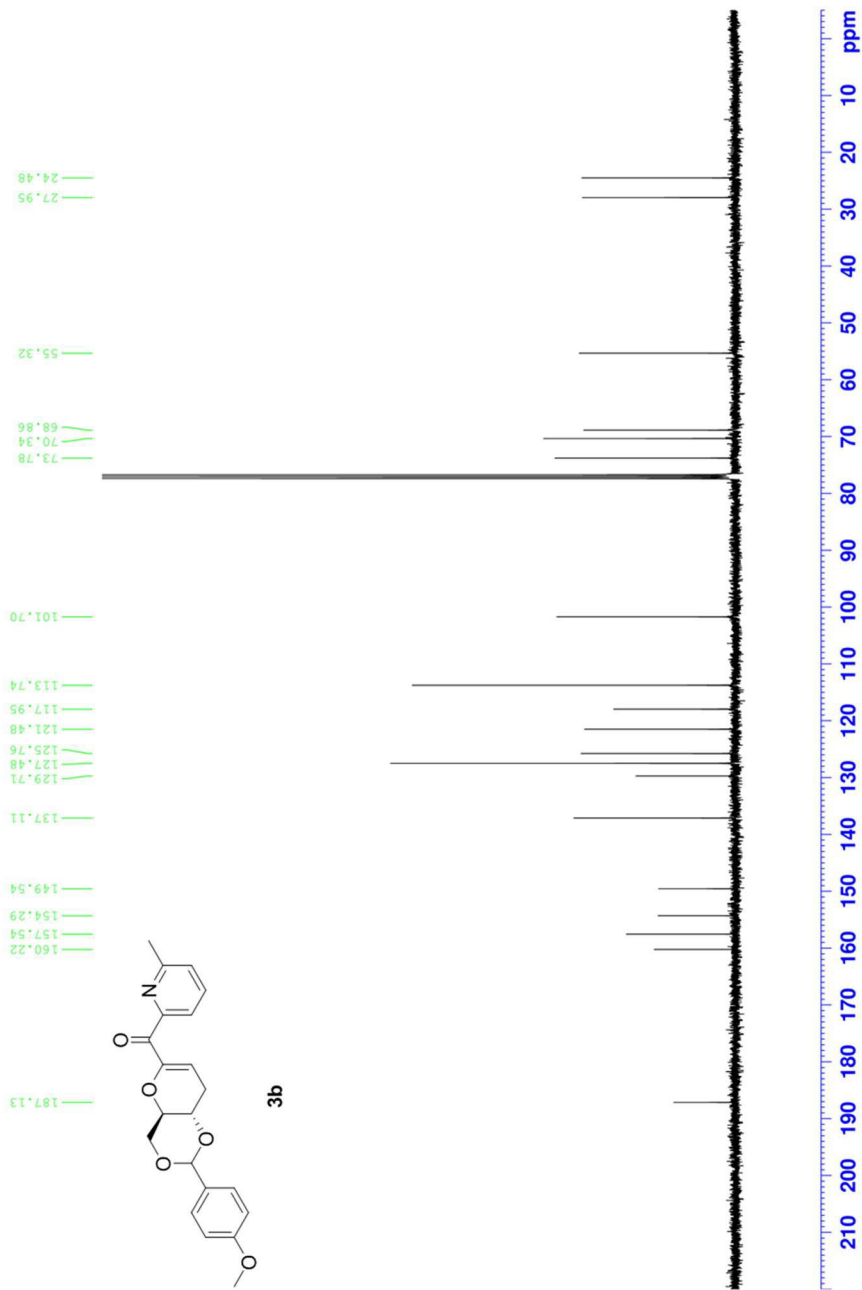

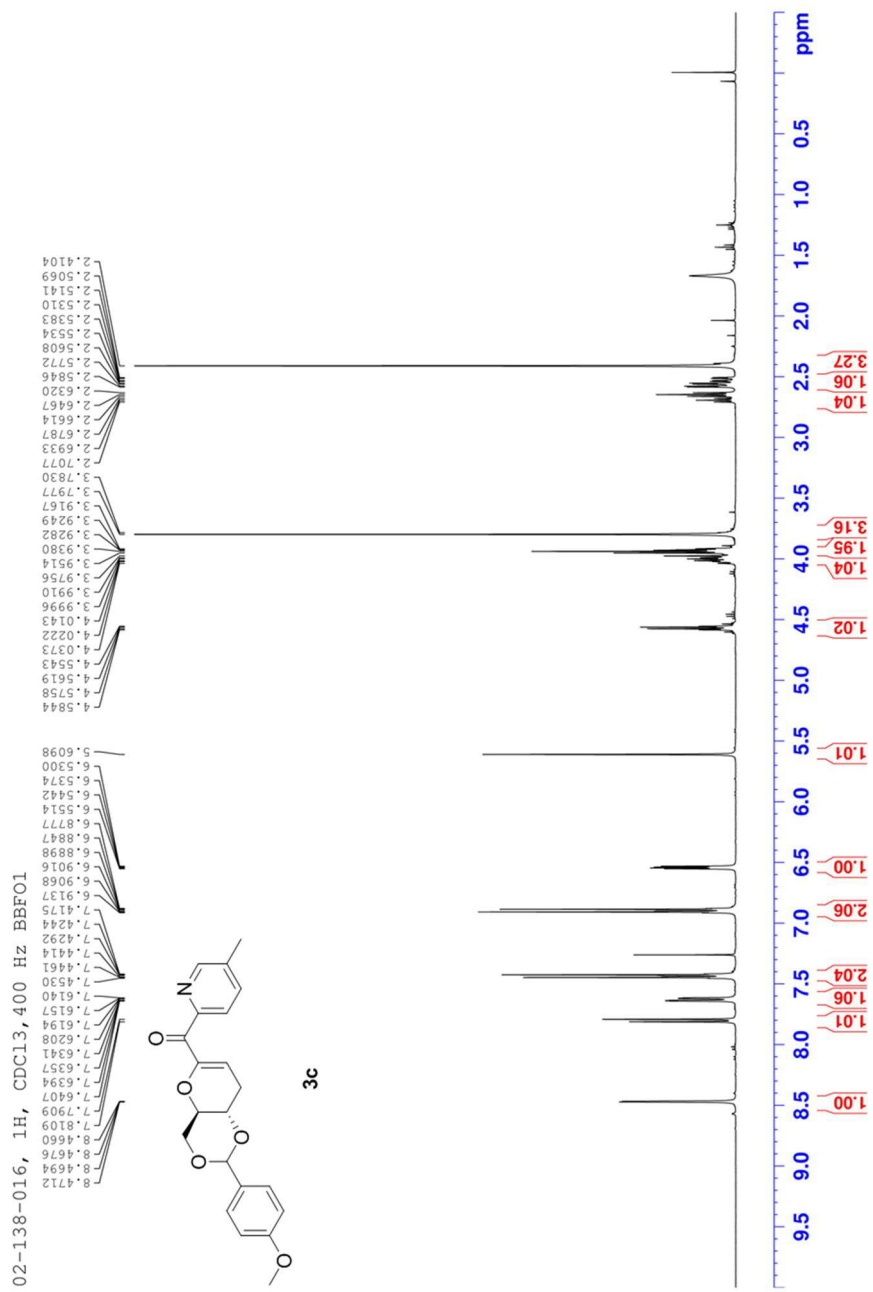

02-138-016, <sup>13</sup>C, CDCl<sub>3</sub>, 400 Hz BBO1

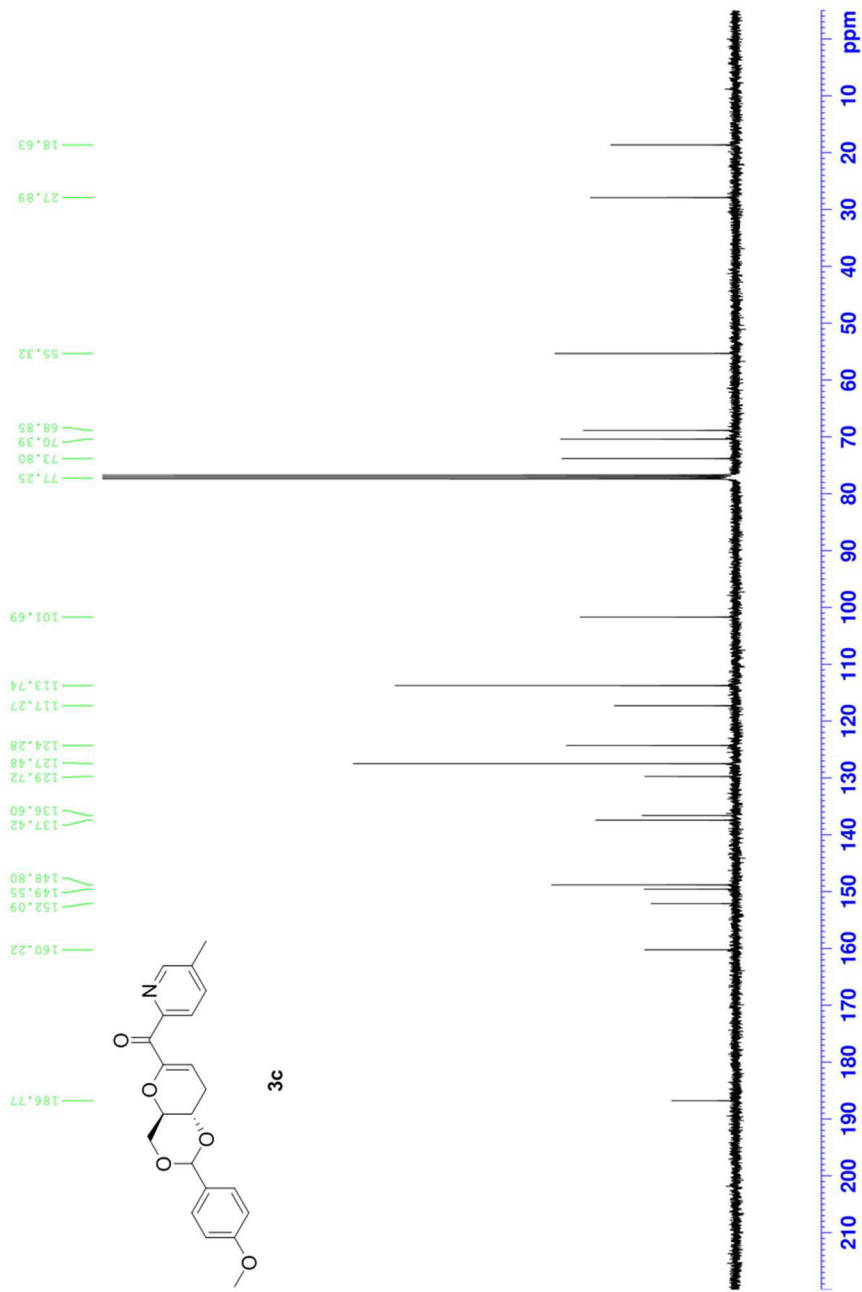

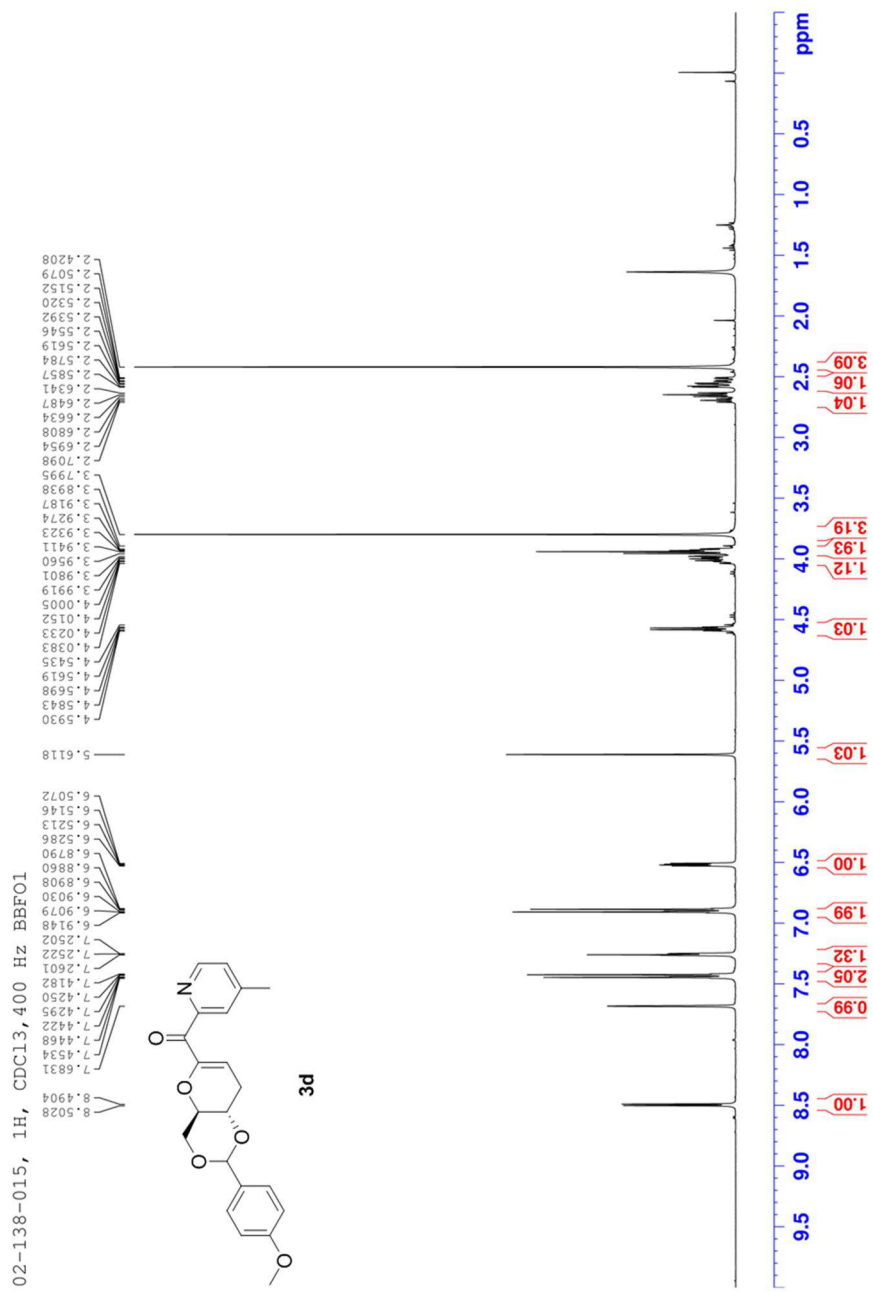

02-138-016, <sup>13</sup>C, CDCl<sub>3</sub>, 400 Hz BBO1

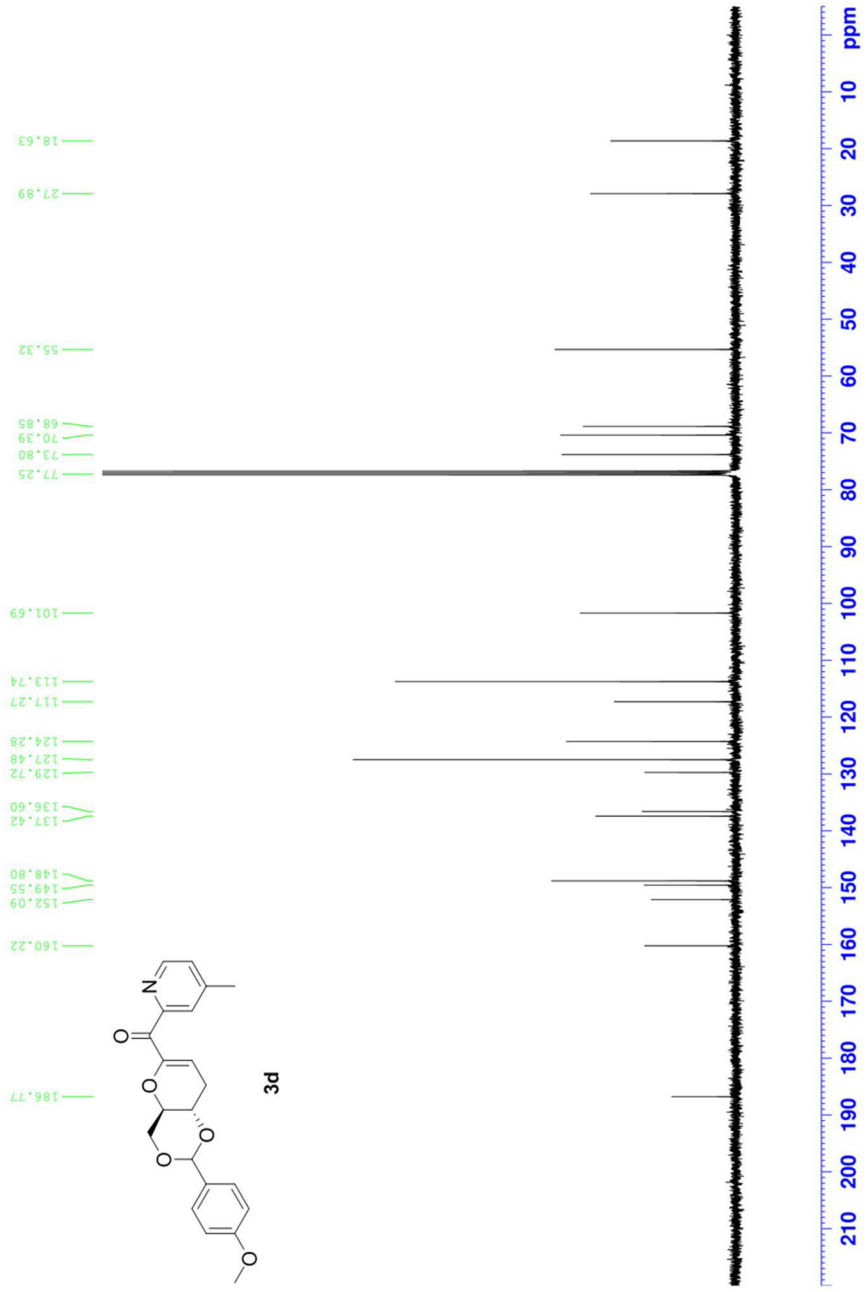

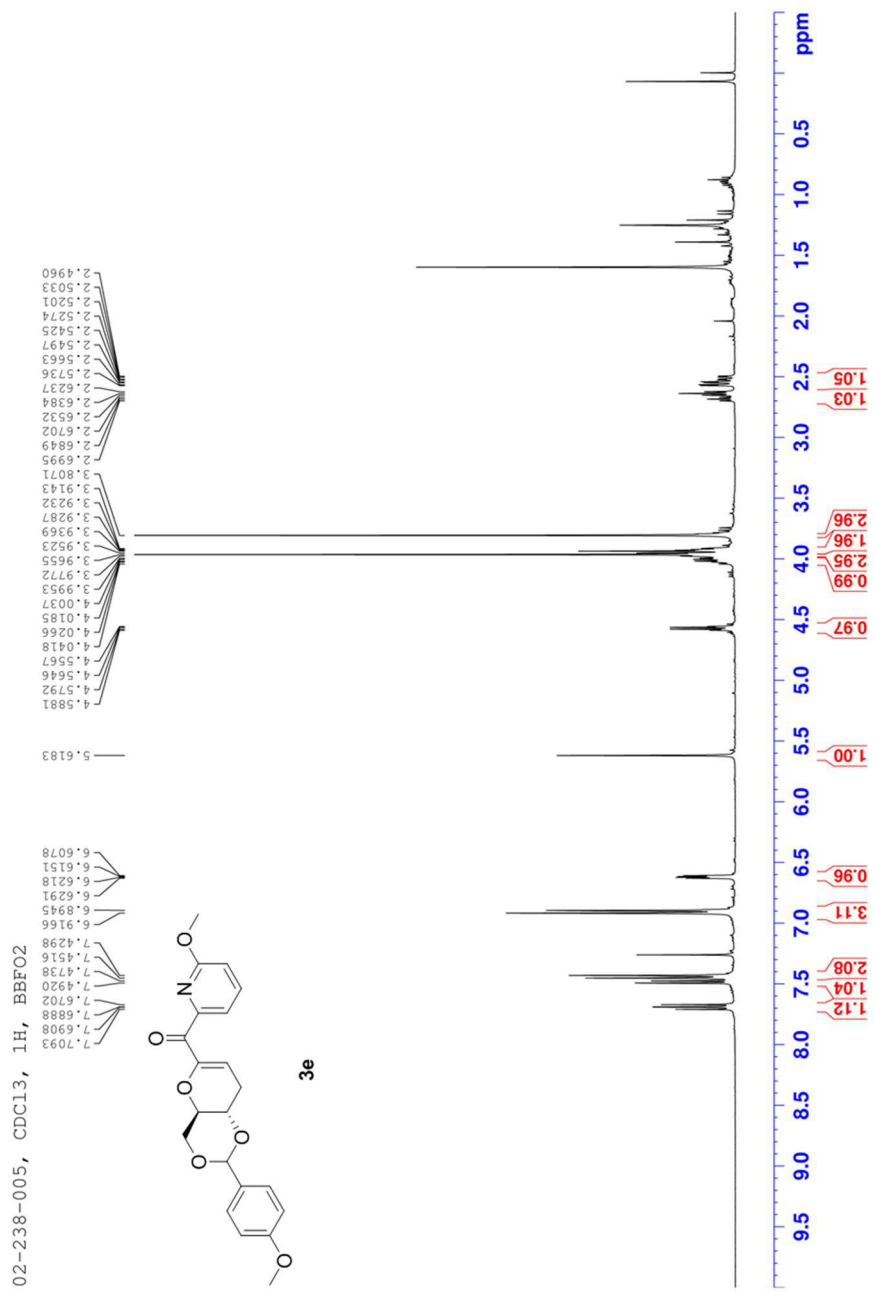



02-238-005, CDCl<sub>3</sub>, <sup>13</sup>C, BBFO2

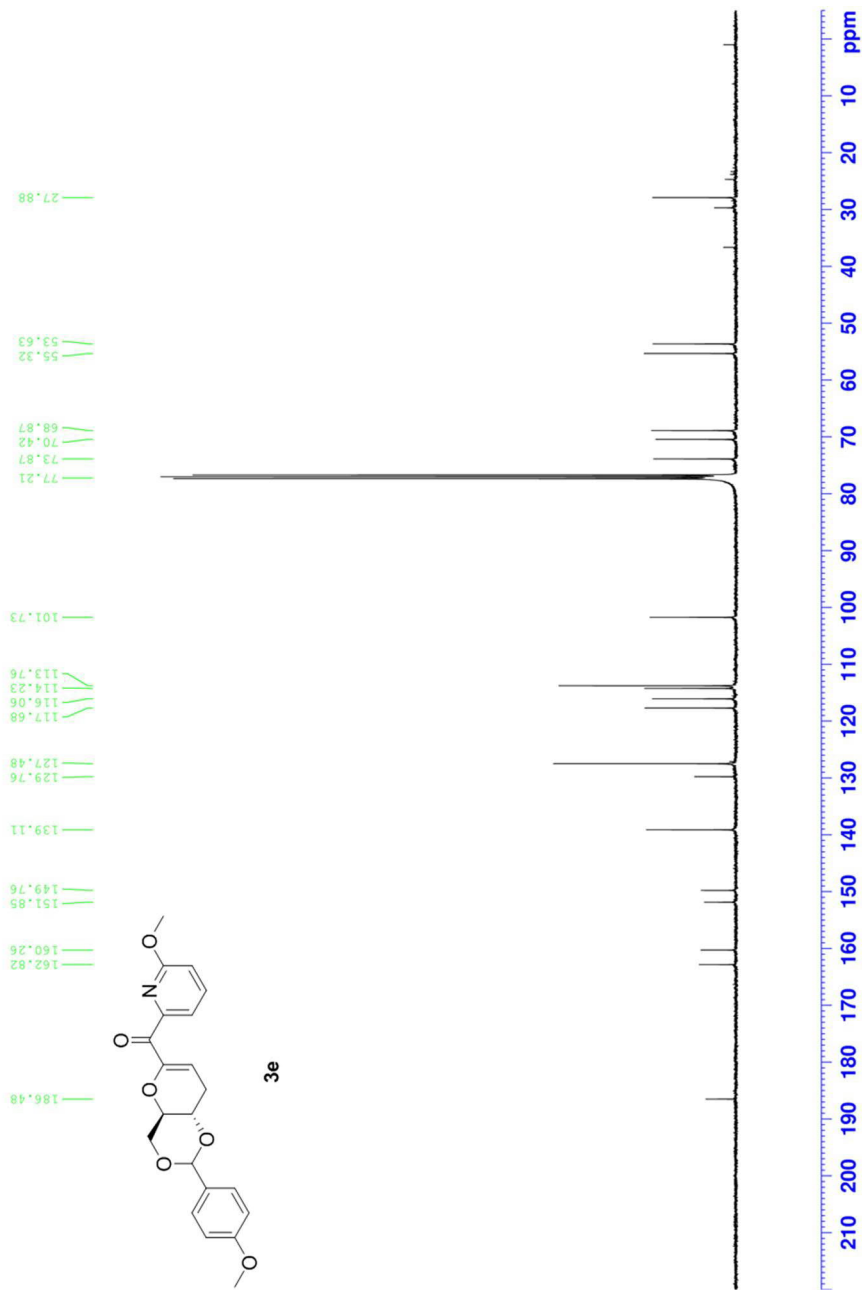

02-238-008, CDCl<sub>3</sub>, BBFO 400-2, 1H NMR

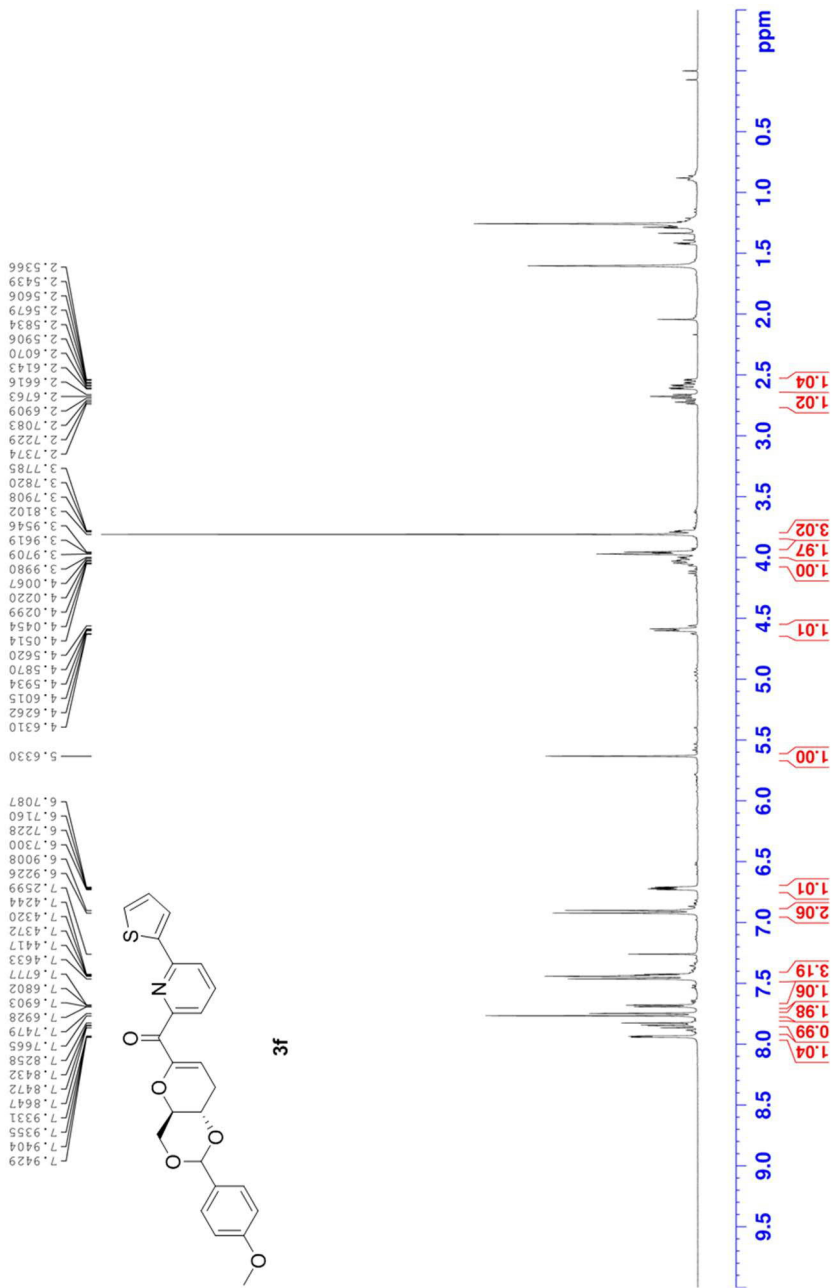

02-238-008, CDCl<sub>3</sub>, BBFO 400-2, <sup>13</sup>C NMR

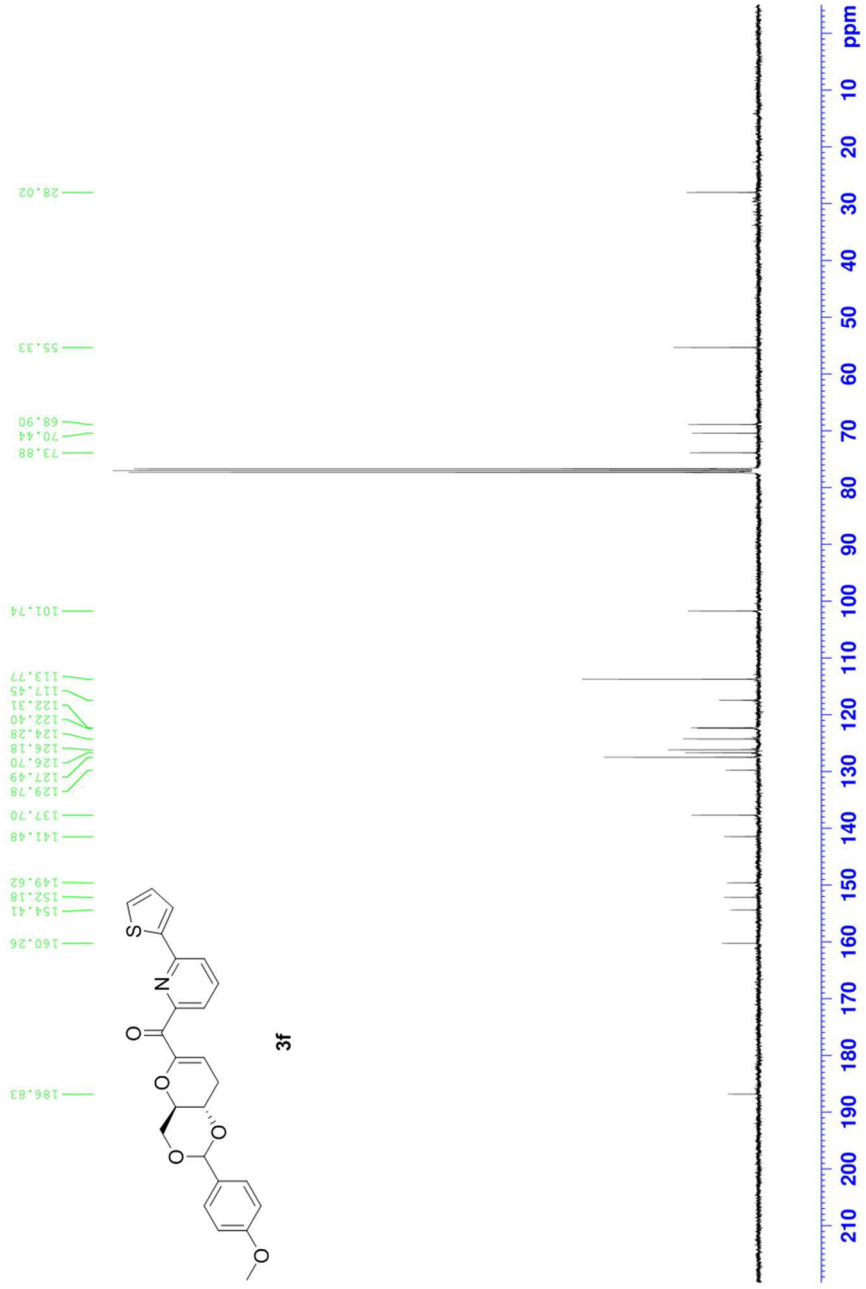

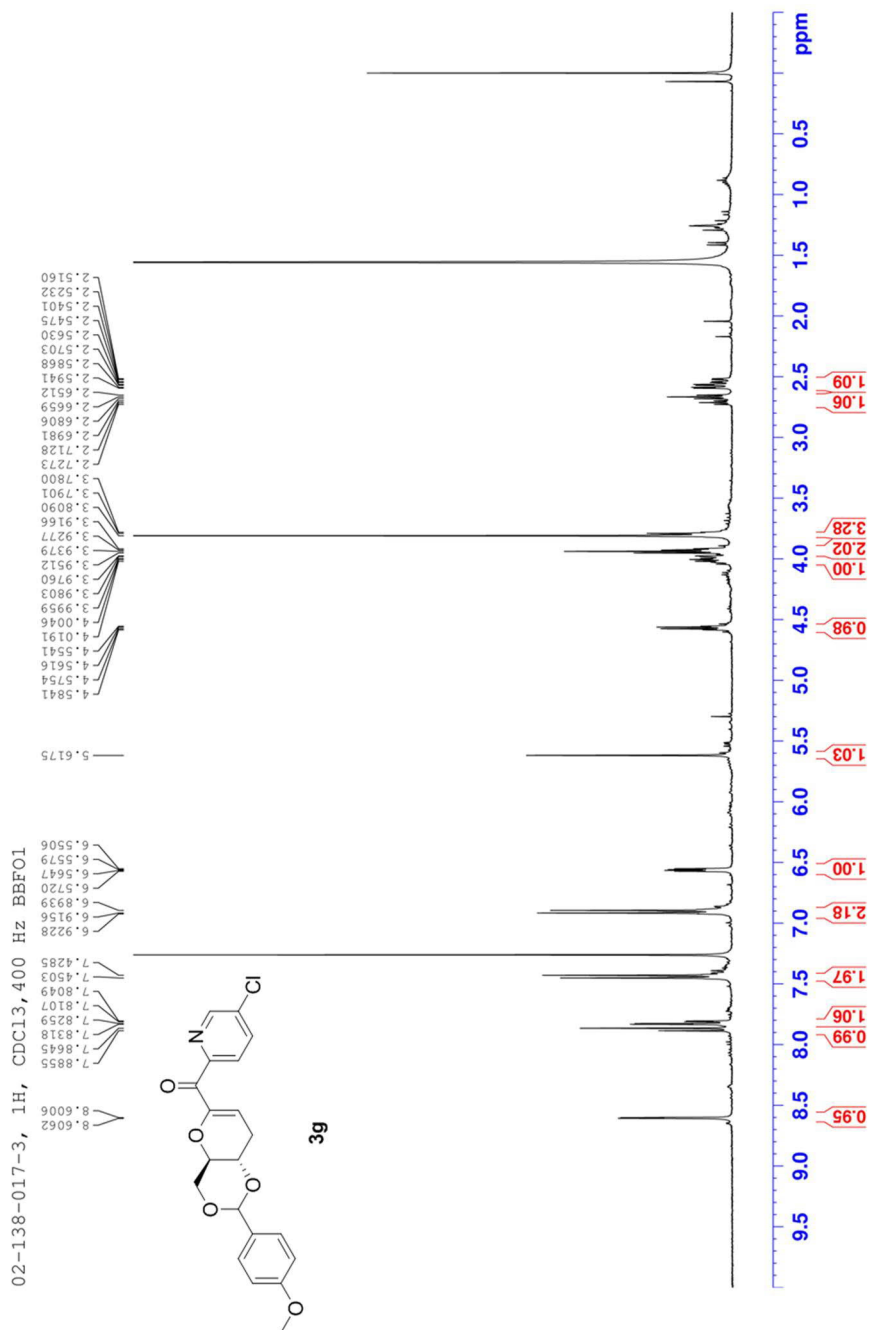

02-238-017-3, 13C, CDCl3, 400 Hz BBFO1

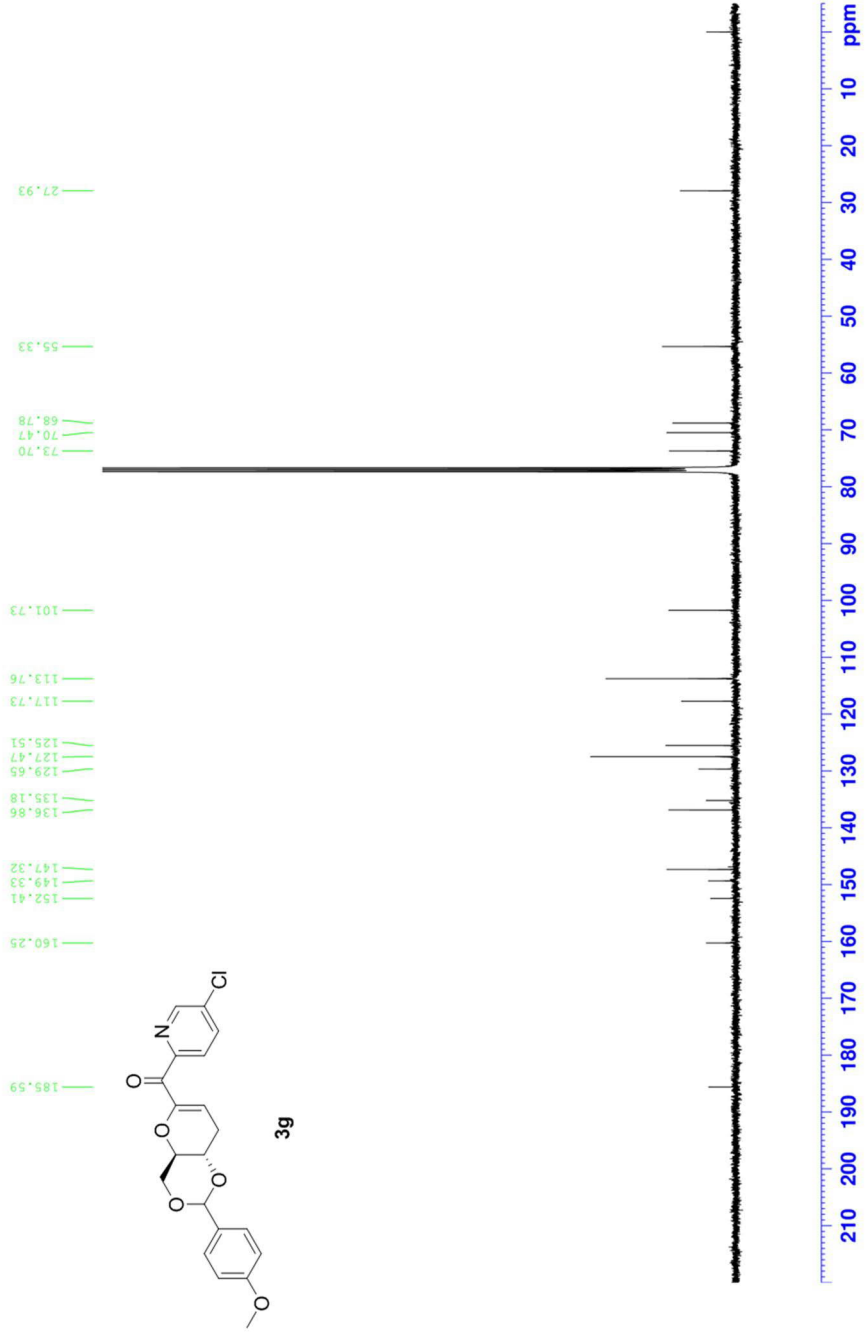

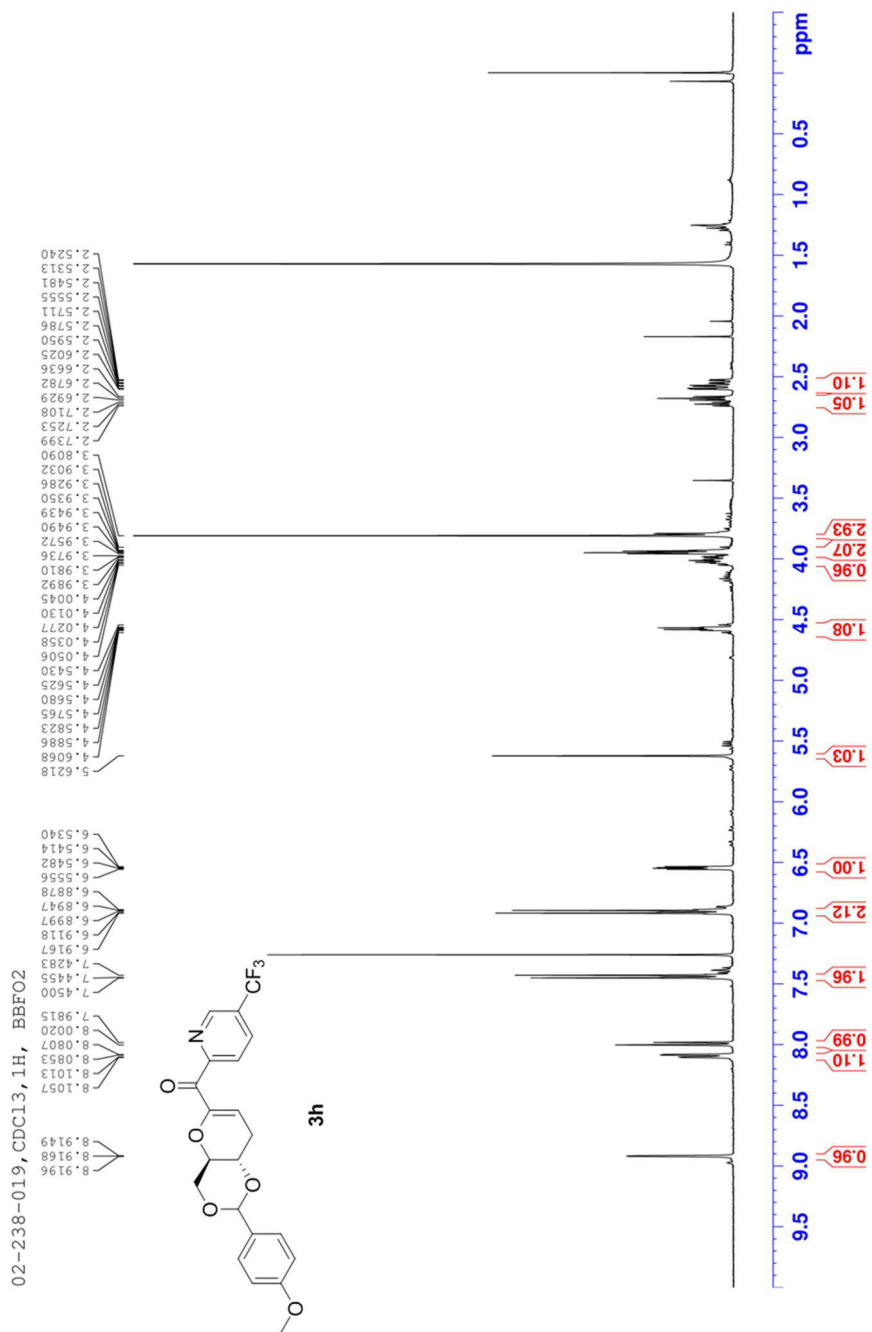

02-238-019, CDCl<sub>3</sub>, 13C, BBO2

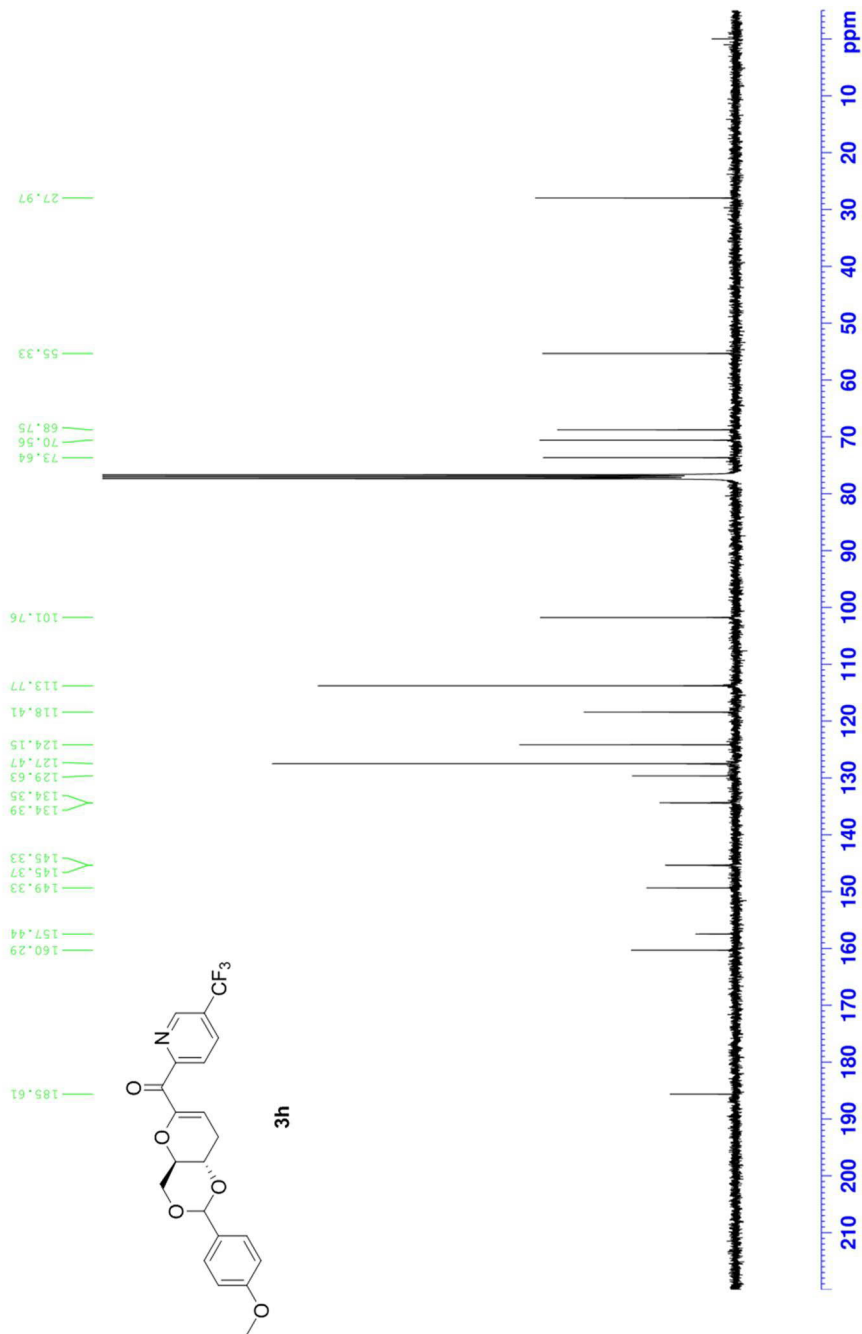

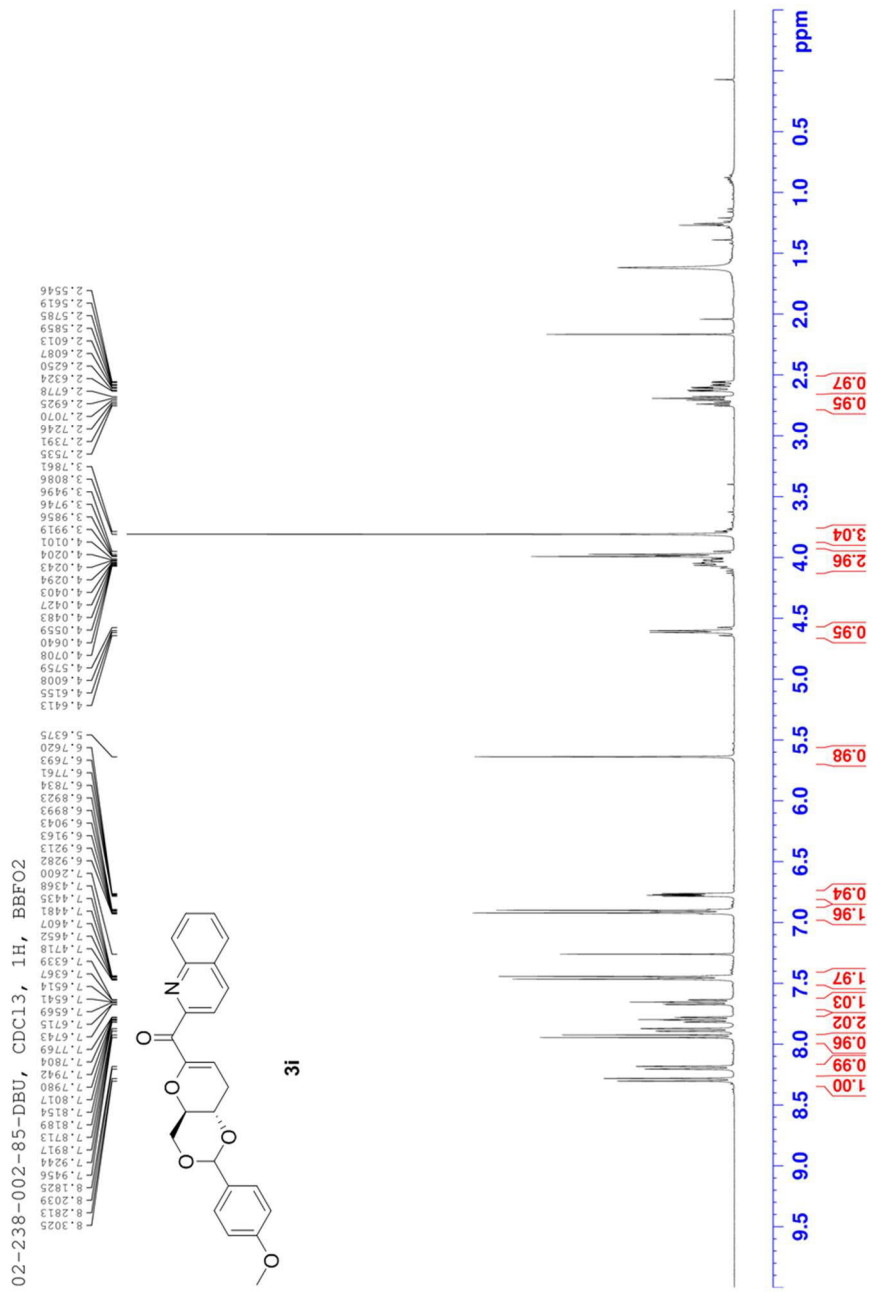



02-238-002-85-DBU, CDCl<sub>3</sub>, 13C, BBFO2

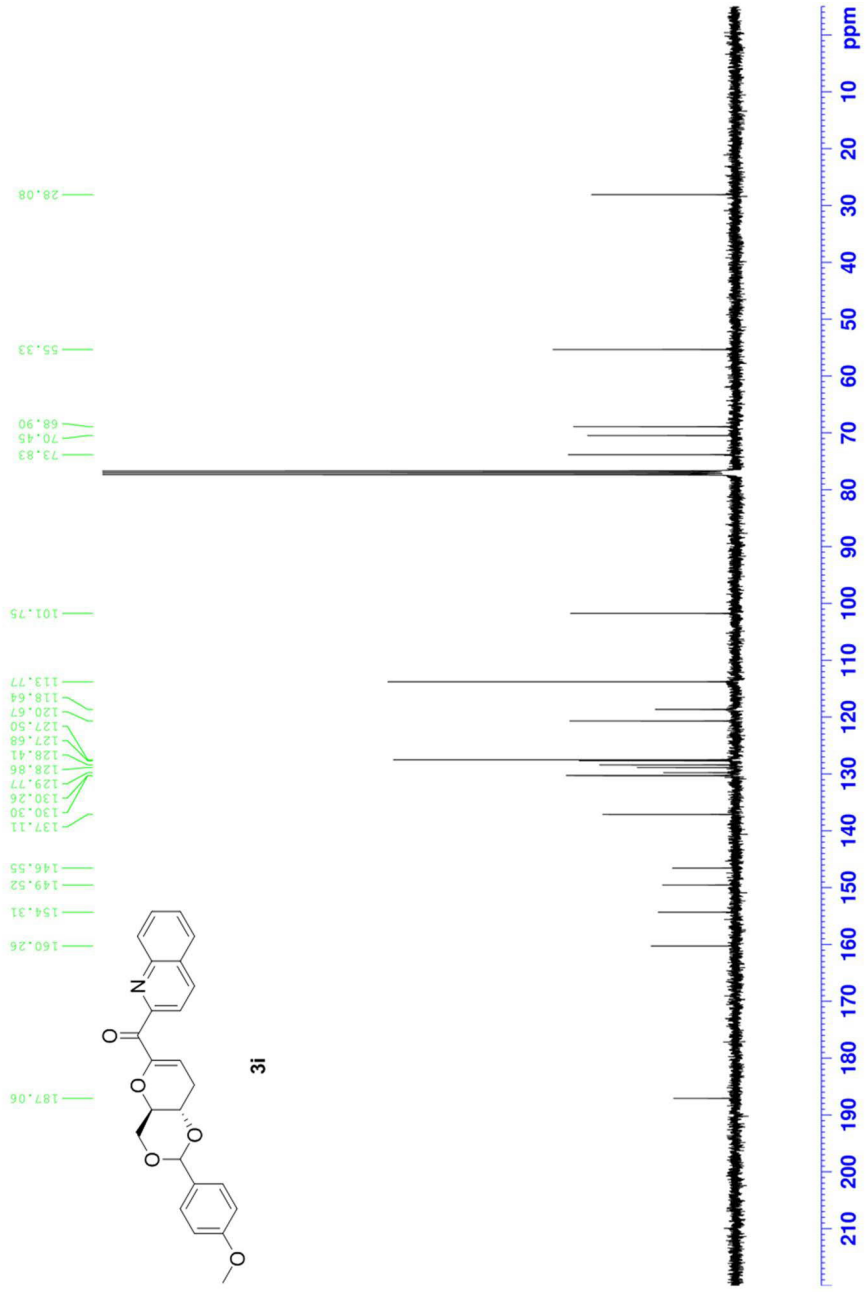

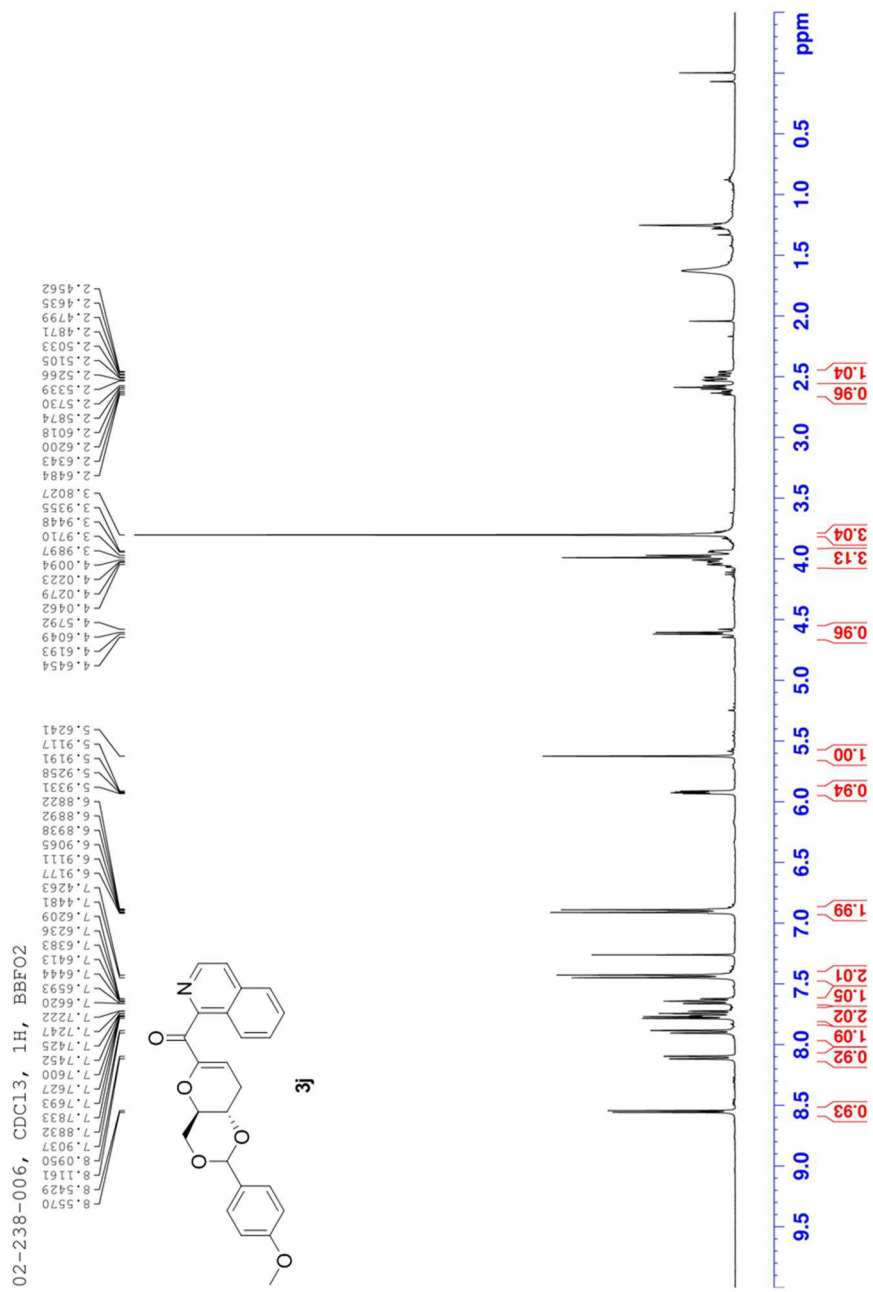

02-238-006, CDCl<sub>3</sub>, 1H, BBFO2

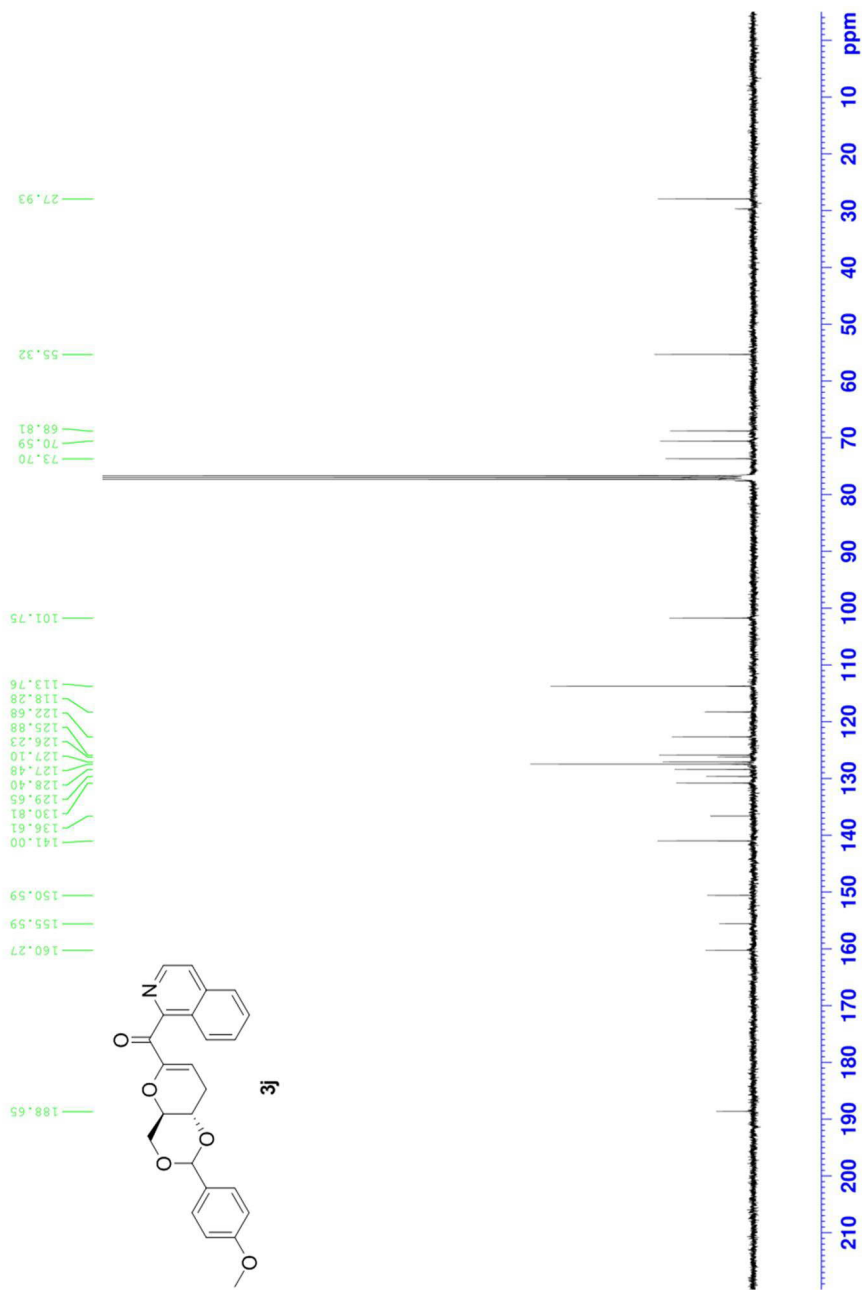

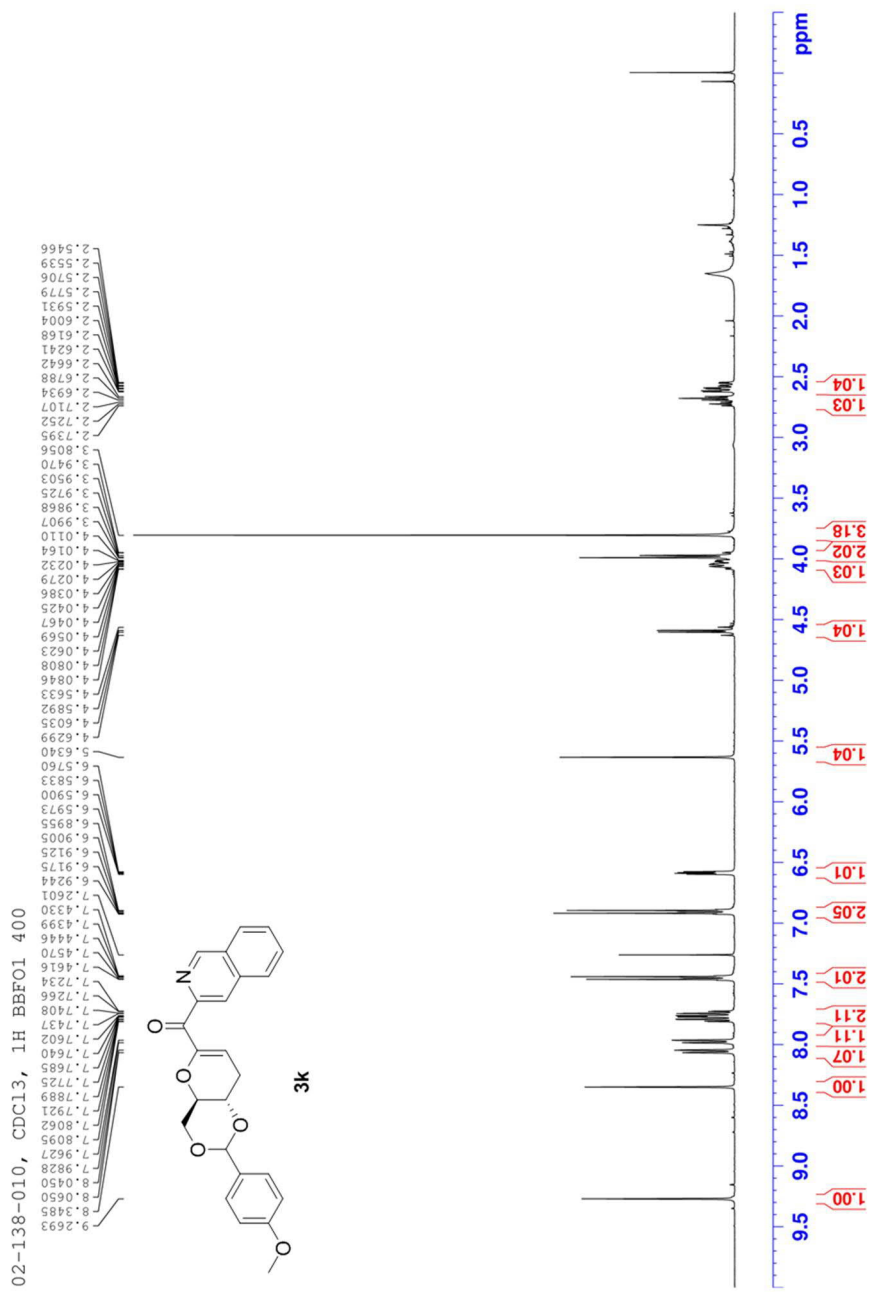

02-138-010, CDCl<sub>3</sub>, 13C BBO1 400

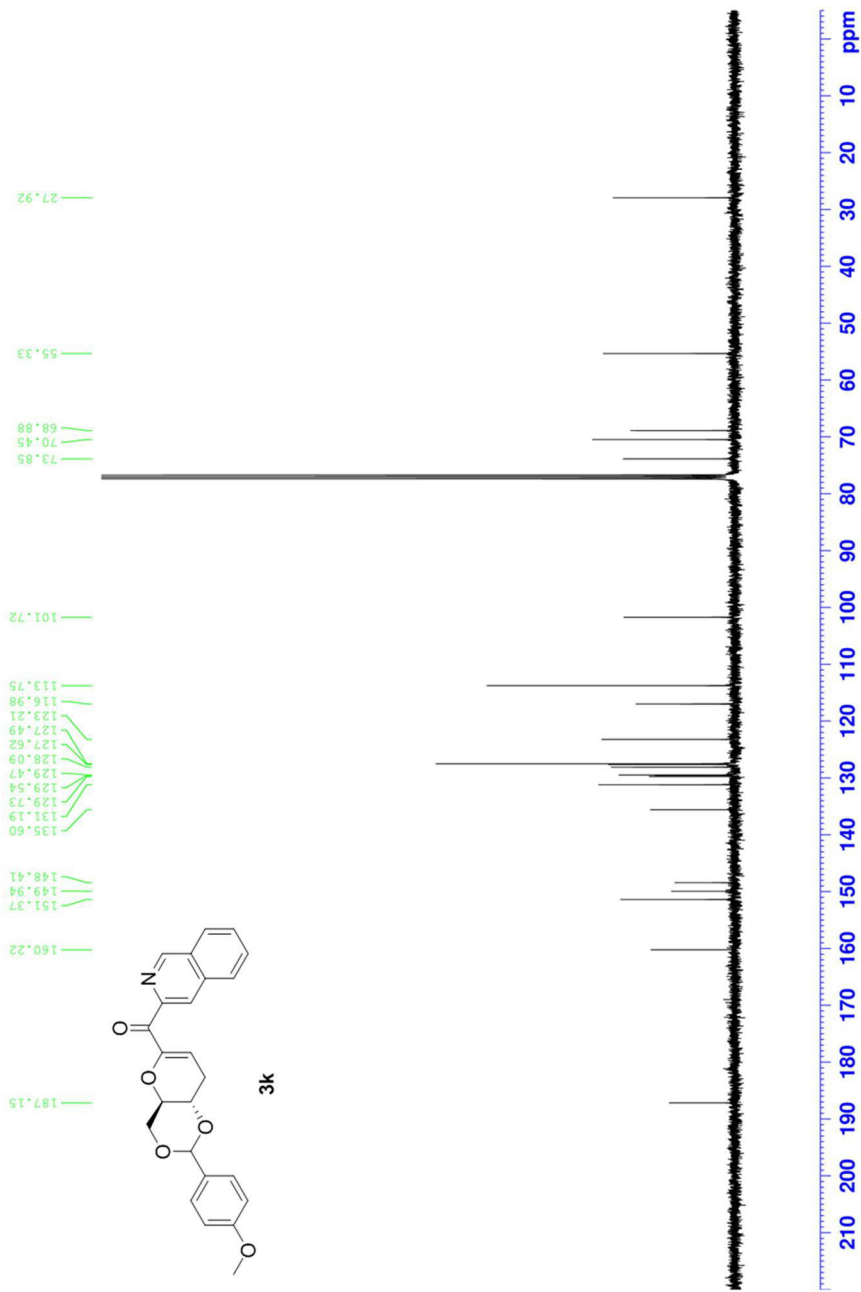

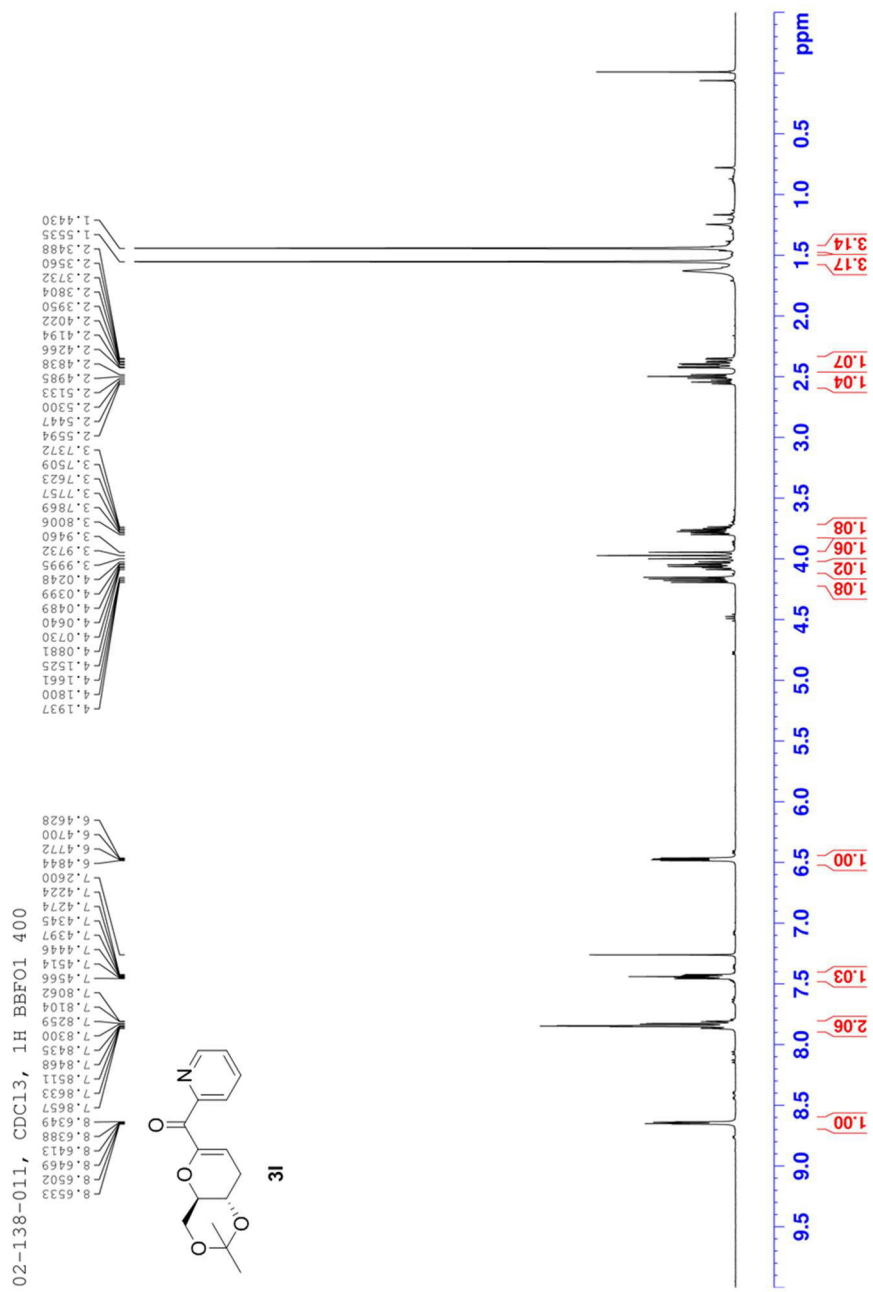

02-138-011, CDCl3, 13C BBF01 400

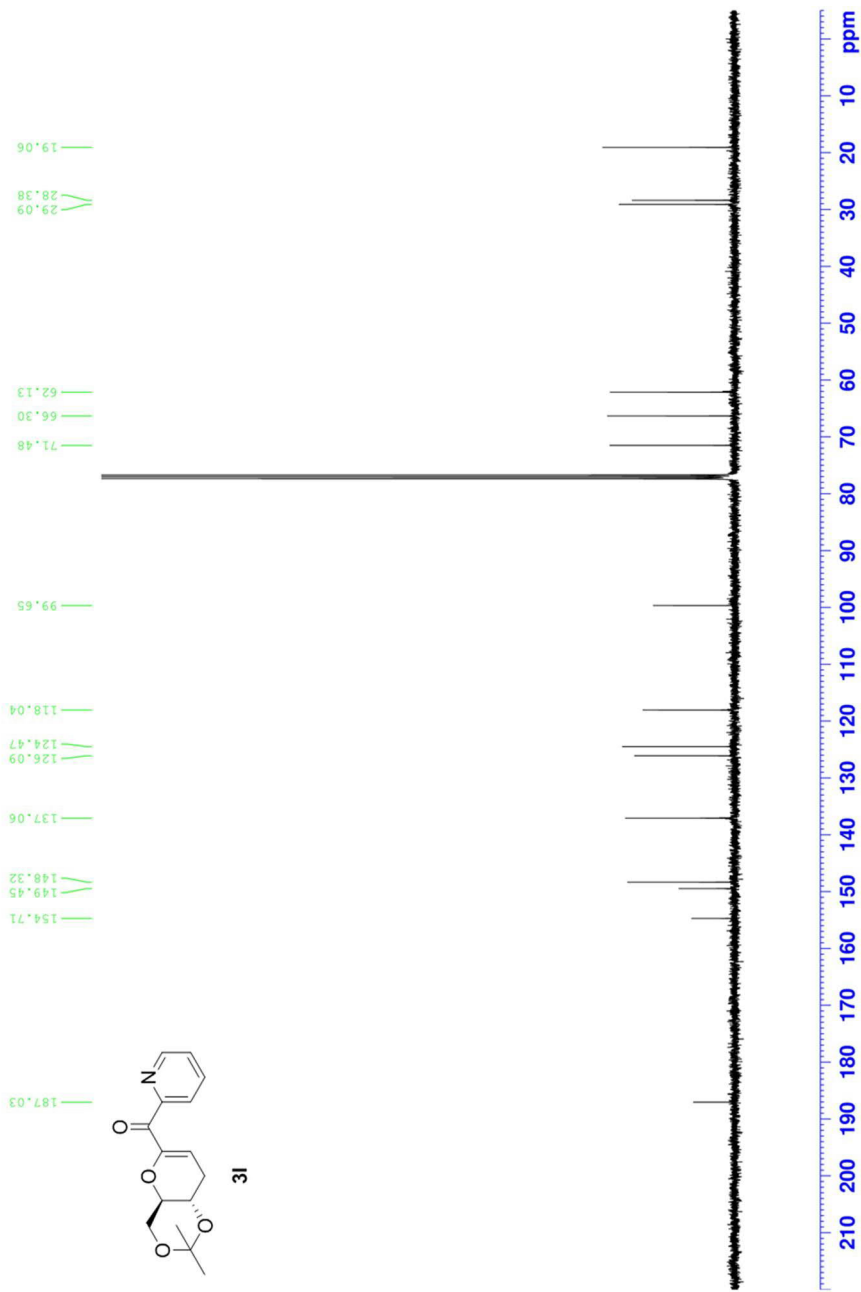

02-138-014, CDCl<sub>3</sub>, 1H BBO1 400

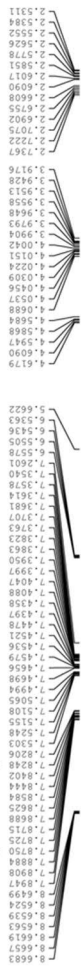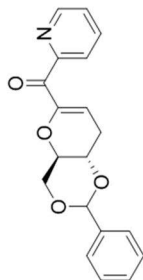

3m

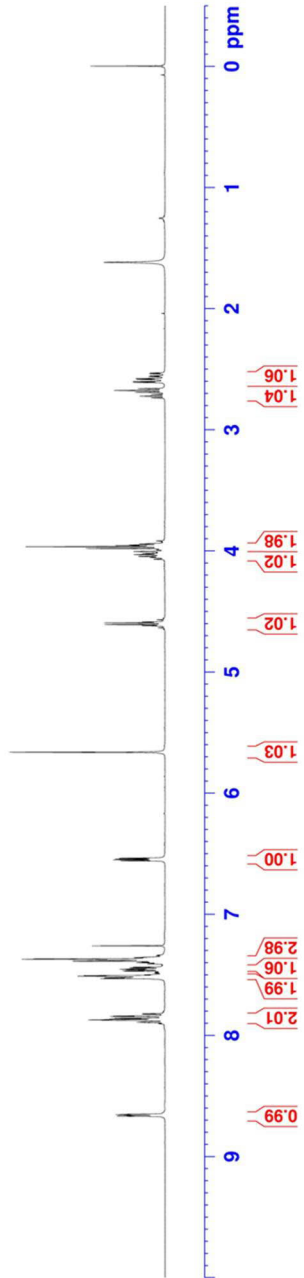



02-138-014, CDCl<sub>3</sub>, 13C BBF01 400

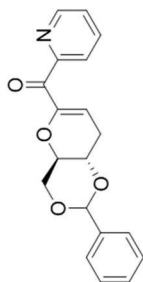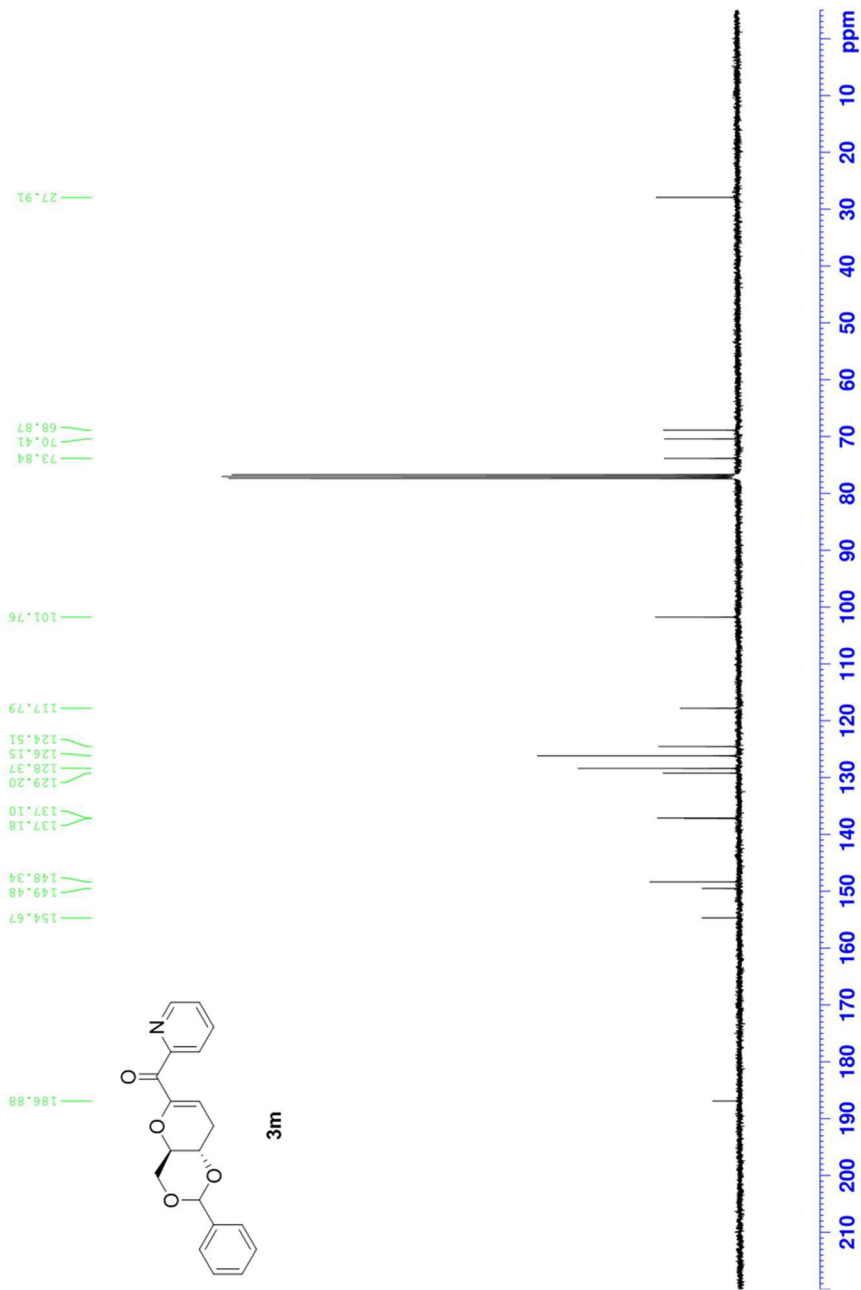

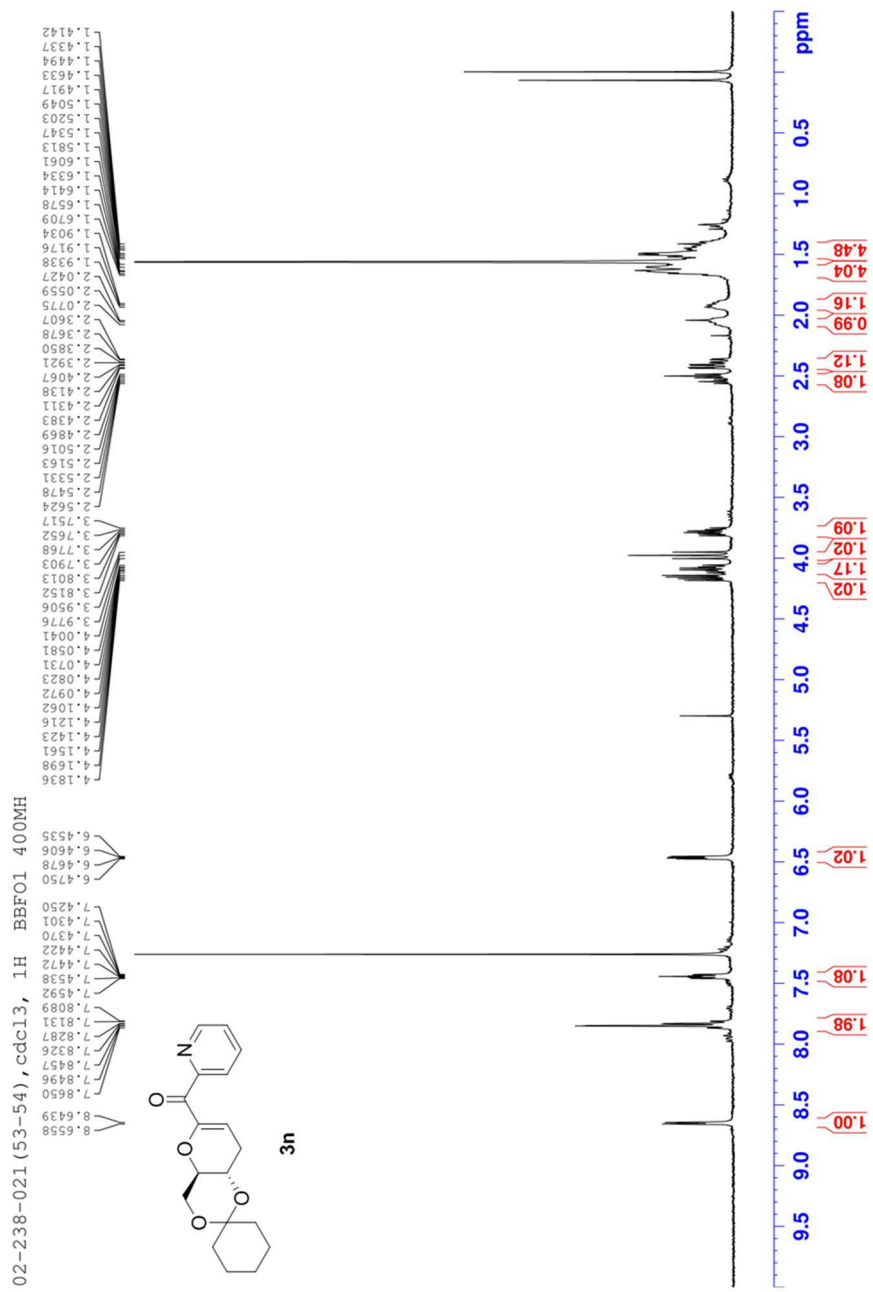

02-238-021-2nd, cdcl3, 13C BBFO1 400MH

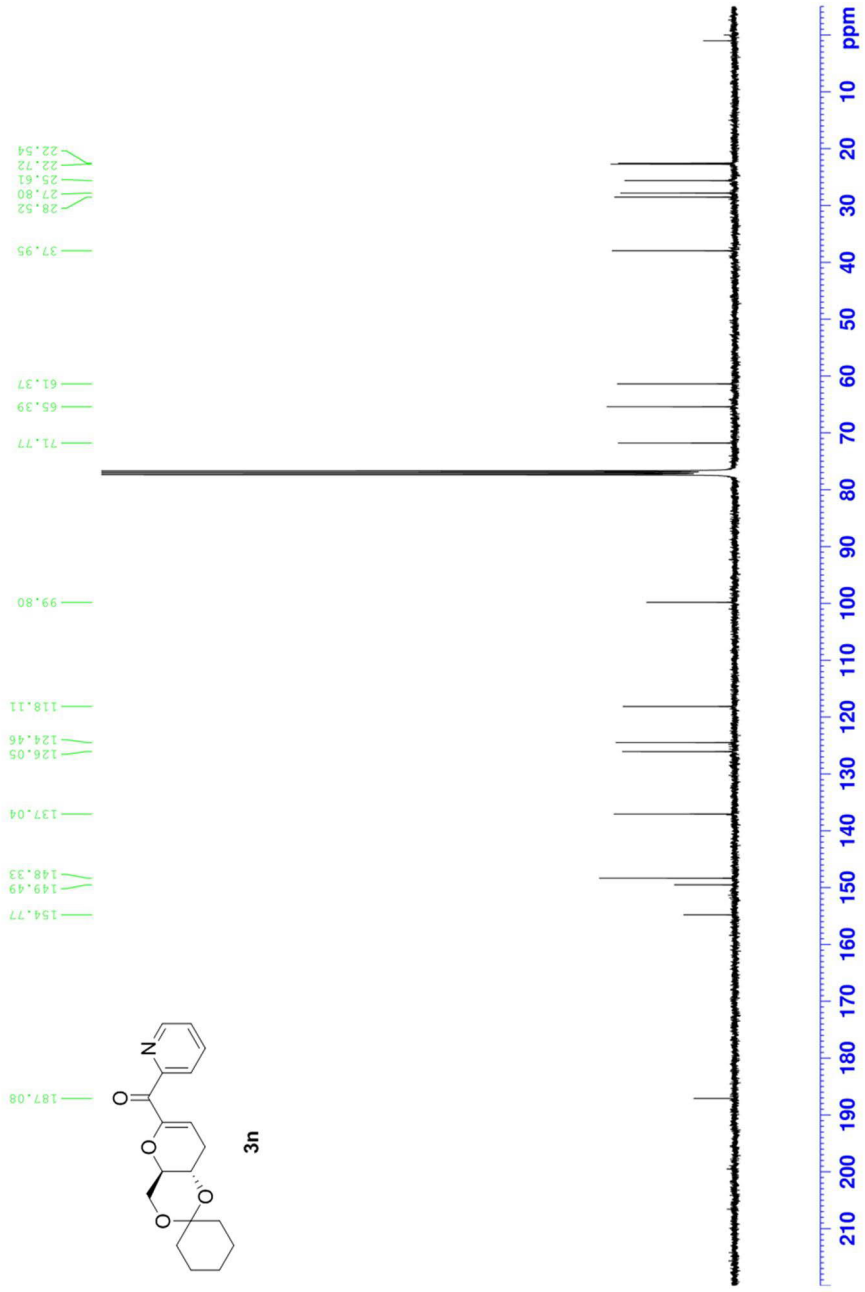

Supplement: c4cc06111j1.pdf [file c4cc06111j1.pdf]
